# Supplementary material for: The Role of Meteorological Conditions and Pollution Control Strategies in Reducing Air Pollution in Beijing during APEC 2014 and Parade 2015
Source: Copernicus journal article supplement (doi:10.5194/acp-2017-456), 2017-05-29
Supplement: Supplementary file 1 [file acp-2017-456-supplement.pdf]

1 **The Role of Meteorological Conditions and Pollution Control**  
2 **Strategies in Reducing Air Pollution in Beijing during APEC 2014 and**  
3 **Parade 2015**

4 Pengfei Liang<sup>1</sup>, Tong Zhu<sup>1\*</sup>, Yanhua Fang<sup>1</sup>, Yingruo Li<sup>1,2</sup>, Yiqun Han<sup>1</sup>, Yusheng Wu<sup>1</sup>,  
5 Min Hu<sup>1</sup>, and Junxia Wang<sup>1</sup>

6 <sup>1</sup>SKL-ESPC and BIC-ESAT, College of Environmental Sciences and Engineering,  
7 Peking University, Beijing, 100871, China

8 <sup>2</sup>Environmental Meteorology Forecast Center of Beijing-Tianjin-Hebei, China  
9 Meteorological Administration, Beijing, 100089, China

10 \*Correspondence to: Tong Zhu (tzhu@pku.edu.cn)

11

12 Supplement Materials

13

14 **S1. Temperature steps and duration of NOISH thermal-optical method protocol.**

15 Table S1. Temperature steps and duration of NOISH thermal-optical method protocol.

| Carrier gas       | Duration (sec) | Temperature (°C) |
|-------------------|----------------|------------------|
| He-1              | 10             | Ambient          |
| He-2              | 95             | 600              |
| He-3              | 90             | 840              |
| He-4              | 30             | No heat          |
| O <sub>2</sub> -1 | 35             | 550              |
| O <sub>2</sub> -2 | 45             | 650              |
| O <sub>2</sub> -3 | 115            | 870              |
| CalGas            | 125            | No heat          |

16

17

18 **S2. The relationship between PM<sub>2.5</sub> concentrations and meteorological parameters.**

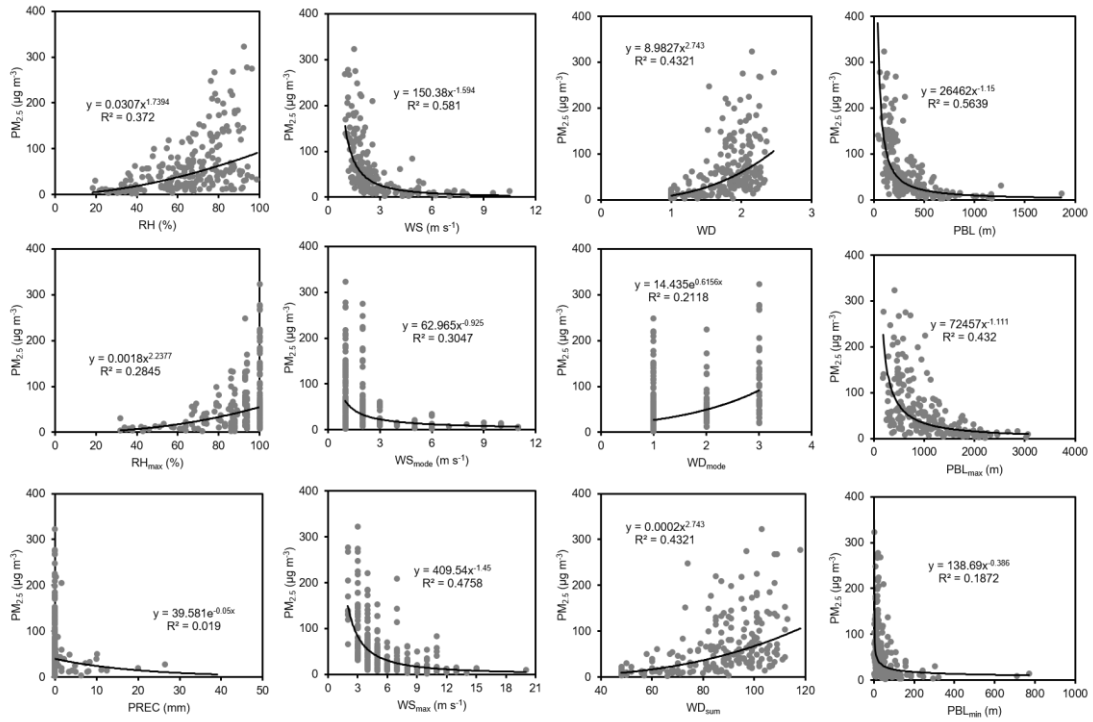

19

20 Fig S2. Scatter plot and correlation between PM<sub>2.5</sub> concentrations (y axis) and  
 21 meteorological parameters (x axis) during the APEC and Parade sampling periods.

22

23 **S3. Error transfer formula**

24  $N = f(x_1, x_2, x_3)$  (1)

25  $\bar{N} = f(\bar{x}_1, \bar{x}_2, \bar{x}_3)$  (2)

26  $S_N = \sqrt{\left(\frac{\partial f}{\partial x_1}\right)^2 S_{x_1}^2 + \left(\frac{\partial f}{\partial x_2}\right)^2 S_{x_2}^2 + \left(\frac{\partial f}{\partial x_3}\right)^2 S_{x_3}^2}$  (3)

27 In this study,  $N$  represents the percentage reduction calculated by comparing the  
28 decreased average pollutant concentration during APEC to that before APEC, and  $x$   
29 represents the pollutant concentrations during and before APEC.

30

31 **S4. Comparison of the observed and GLM-predicted pollutant concentrations.**

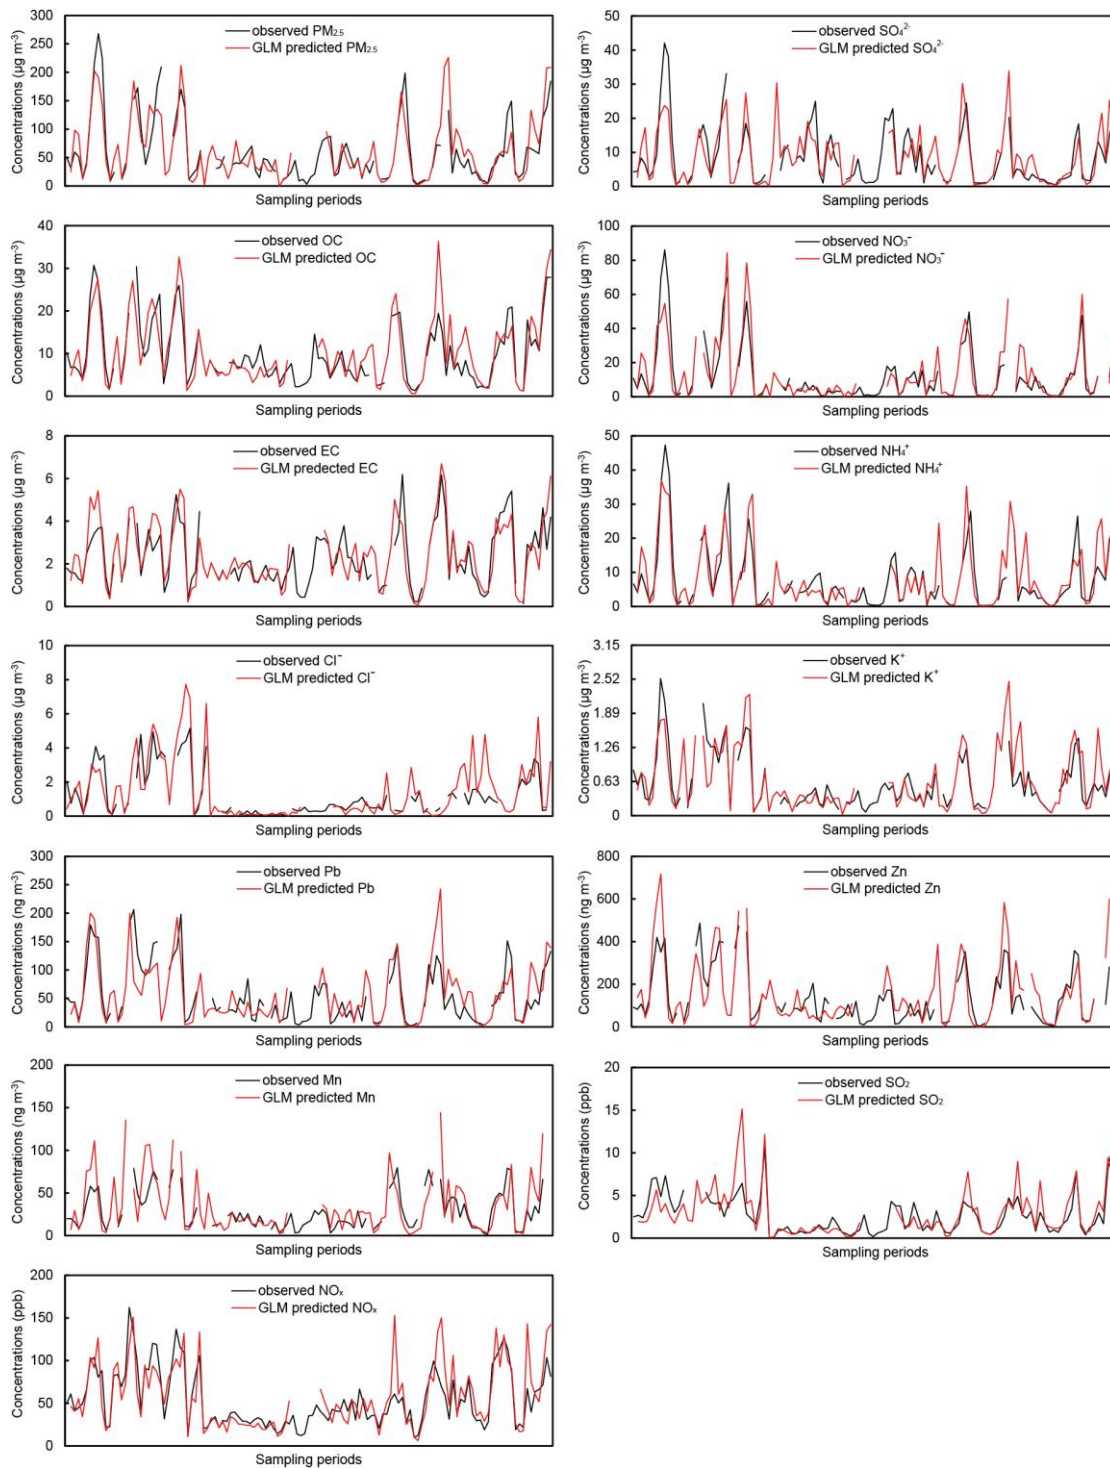

32  
33 Fig S4. Time series of the observed (in black line) and GLM-predicted pollutant  
34 concentrations (in red line).

35

36 **S5. Hypothesis K-S test summary of the unstandardized/standardized residual.**

37 Table S5. Hypothesis K-S test summary of the unstandardized/standardized residual.

|   | Null Hypothesis                                                                                     | Test                               | Sig.* | Decision                    |
|---|-----------------------------------------------------------------------------------------------------|------------------------------------|-------|-----------------------------|
| 1 | The distribution of Unstandardized Residual is normal with mean - 0.00 and standard deviation 0.40. | One-Sample Kolmogorov-Smirnov Test | 0.96  | Retain the null hypothesis. |
| 2 | The distribution of Standardized Residual is normal with mean - 0.01 and standard deviation 0.96.   |                                    |       |                             |

\*The significance level is 0.05.

38

39 Hypothesis K-S test is often applied to test the normal distribution of a series of  
 40 values. In this case, the test retains the null hypothesis that the distribution of  
 41 unstandardized and standardized residual is normal, indicating that the residual follows  
 42 the normal distribution.
