# Supplementary material for: The Role of Meteorological Conditions and Pollution Control Strategies in Reducing Air Pollution in Beijing during APEC 2014 and Parade 2015
Source: Copernicus journal article supplement (doi:10.5194/acp-2017-456), 2017-05-29
Supplement: Supplementary file [file acp-2017-456-AC1-supplement.pdf]

**Response to the *Interactive comments from Referees on “The Role of Meteorological Conditions and Pollution Control Strategies in Reducing Air Pollution in Beijing during APEC 2014 and Parade 2015” by Pengfei Liang et al.***

We thank the referees for the helpful comments. We have revised the manuscript according to the suggestions and responded to their concerns below.

**Referee #1:**

**General Comments:**

***General Comment 1:** Too many tables were included in the main text, so I suggest the authors adjust the structures of the manuscript and move some of the tables and figures to the supplement to make it more concise and clear.*

**Response to General Comment 1:** Accepted. We move a number of tables and figures to the supplement or other sections of the manuscript.

Table 2 (Table 1 at present) remains in “Introduction”, since it illustrates the background of the GLM in this study. By comparing the GLM with the statistic models used in other studies, the theoretical basis and advantages of the GLM can be better illustrated.

**Changes in the Manuscript:** Table 1 (Table 2 at present) is moved to “Measurements and Methods”. Table 5 (Table S5 at present) and Table 6 (Table S7 at present), Figure 5 (Figure S3 at present), Figure 6 (Figure S4 at present), Figure 9 (Figure S8 at present), and Figure 12 (Figure S9 at present)

are moved from the main text to supplement. Please refer to Page 9 Line 178-180 and Page 12 Line 237-242.

**General Comment 2:** *The authors used two methods to separate out the influence of meteorological conditions on the air pollutant concentrations to give a fairly and accurate evaluation of effectiveness of pollution control strategies. It seems that the authors think the GLM method is better than the “stable meteorological condition” method? If so, why the authors focused on the explanations of the results of “stable meteorological condition” method?*

**Response to General Comment 2:** Agree. The discussion of the results of the GLM method is weak and need more in-depth discussion. .

**Changes in the Manuscript:** The results of the “stable meteorological condition” method are simplified. Please refer to Page 17 Line 351-356. The results of the GLM method is emphasized in Section 3.3. Figure S4 (Figure 8 at present) “Time series of the observed and GLM-predicted pollutant concentrations” is moved from the supplement to the manuscript. Please refer to Page 18 Line 382-384. Table 8 is added to the manuscript. Please refer to Page 21 Line 450 to Page 22 Line 462. The discussion of pollutant concentrations variations is emphasized. Please refer to Page 24 Line 496-499 and Page 24 Line 506-509. Section 3.3.4 “Uncertainties of the GLM” is added to the manuscript. Please refer to Page 26 Line 544-557.

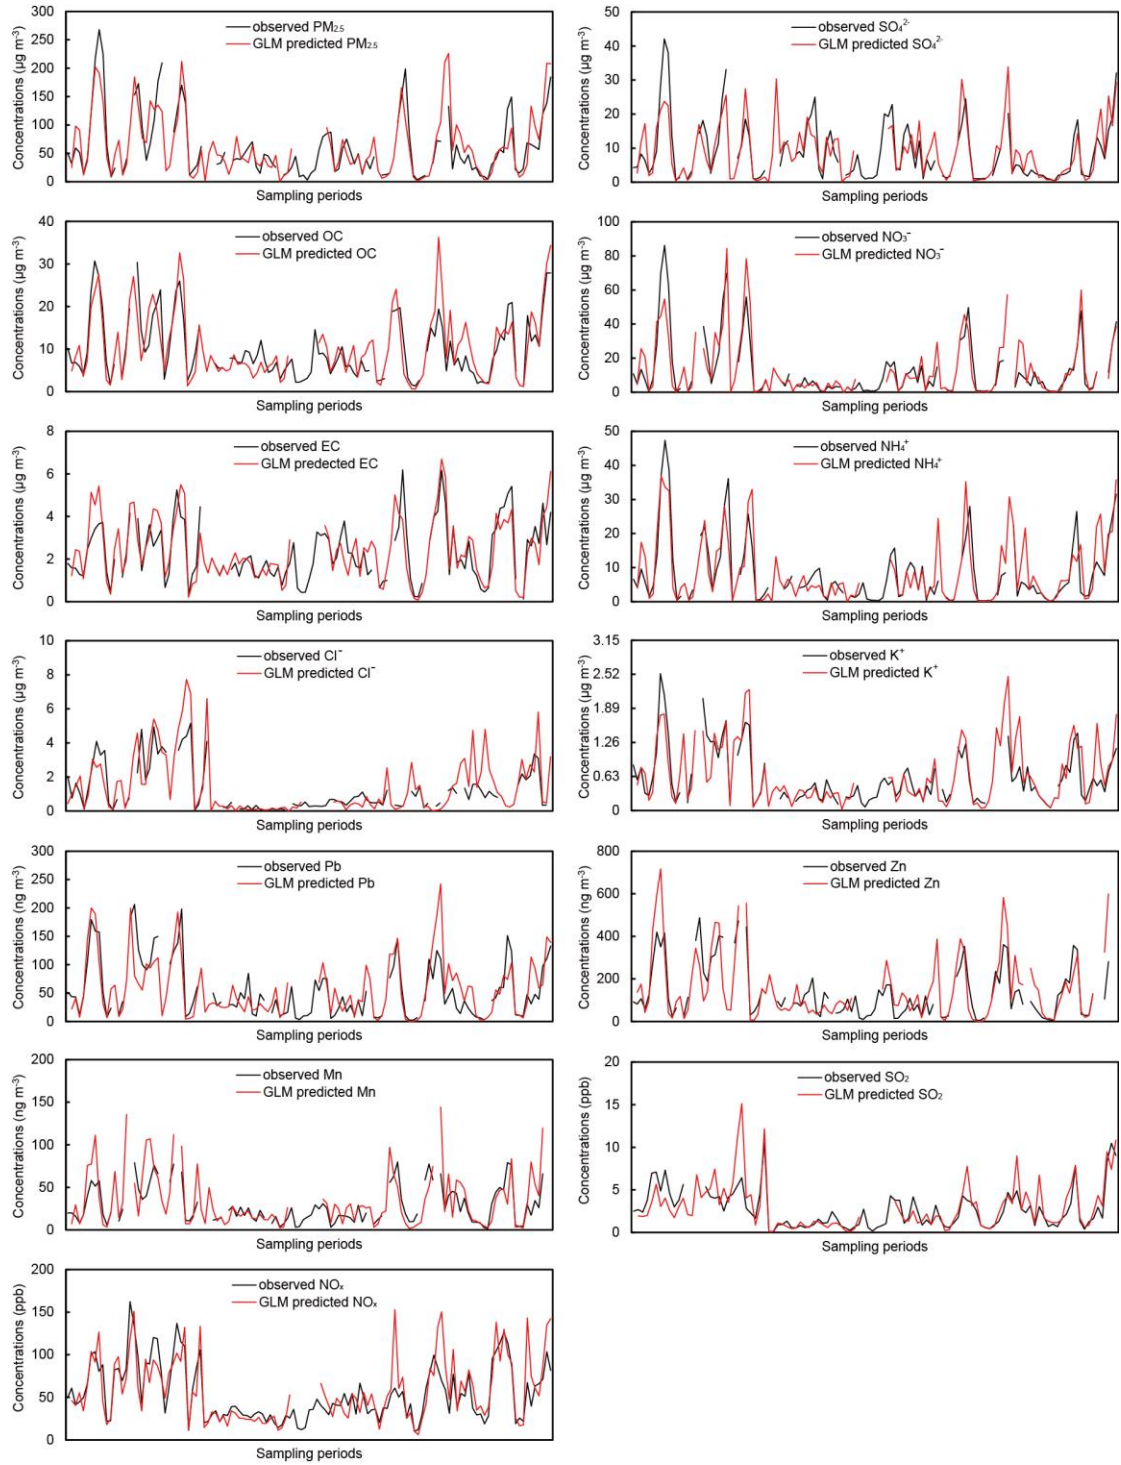

Figure 8. Time series of the observed (in black line) and GLM-predicted pollutant concentrations (in red line).

Table 8. The influence of the meteorological parameters included in the GLMs on pollutant concentrations<sup>1</sup>.

| Parameters             | Included in the GLM (times) <sup>2</sup> |                   |    |    |                               |                              |                              |                 |                |    |    |    |                 |                 |
|------------------------|------------------------------------------|-------------------|----|----|-------------------------------|------------------------------|------------------------------|-----------------|----------------|----|----|----|-----------------|-----------------|
|                        |                                          | PM <sub>2.5</sub> | EC | OC | SO <sub>4</sub> <sup>2-</sup> | NO <sub>3</sub> <sup>-</sup> | NH <sub>4</sub> <sup>+</sup> | Cl <sup>-</sup> | K <sup>+</sup> | Pb | Zn | Mn | SO <sub>2</sub> | NO <sub>x</sub> |
| PBL                    | 13                                       | -                 | -  | -  | -                             | + -                          | -                            | -               | + -            | -  | -  | -  | -               | -               |
| WS <sub>(lag)</sub>    | 9                                        | -                 | -  |    | -                             | -                            | -                            |                 | -              | -  | -  |    | -               |                 |
| PREC <sub>(lag)</sub>  | 8                                        | -                 | -  | -  | -                             |                              |                              |                 |                | -  |    | -  | -               | -               |
| PREC                   | 7                                        | -                 |    |    | -                             | -                            | -                            |                 | -              |    |    | -  | -               |                 |
| WS                     | 7                                        | -                 |    | -  | +                             | +                            |                              |                 | -              | -  | -  |    |                 |                 |
| RH                     | 6                                        |                   |    |    | +                             | +                            | +                            |                 | +              |    |    | -  | -               |                 |
| PBL <sub>(lag)</sub>   | 5                                        | +                 | +  |    | +                             |                              |                              |                 | -              |    |    | +  |                 |                 |
| RH <sub>(lag)</sub>    | 5                                        |                   |    | -  |                               | -                            | -                            |                 | -              |    |    |    |                 |                 |
| T                      | 5                                        |                   | +  | +  | +                             | + -                          |                              |                 |                |    |    |    |                 | - +             |
| T <sub>(lag)</sub>     | 5                                        | +                 |    |    |                               |                              | +                            | -               | +              | +  |    |    |                 |                 |
| WD/WS <sub>(lag)</sub> | 4                                        | +                 |    | +  |                               |                              |                              |                 | +              |    |    | +  |                 |                 |
| SLP                    | 3                                        | -                 |    |    |                               |                              |                              |                 |                |    |    | -  | +               |                 |
| WD                     | 3                                        |                   |    | +  |                               | +                            |                              | +               |                |    |    |    |                 |                 |
| WD/WS                  | 3                                        |                   | +  |    |                               |                              |                              |                 |                |    |    | +  |                 | +               |
| WD <sub>(lag)</sub>    | 1                                        |                   |    |    |                               |                              |                              |                 |                |    |    |    | +               |                 |

<sup>1</sup> "+" represents the positive correlation, and "-" represents the negative correlation between meteorological parameters and pollutant concentrations.

<sup>2</sup>If a parameter is included in the model for several times, it will be counted as one time.

## **Detailed Comments:**

**Detailed Comment 1:** *The abstract is too long, please give a concise and clearly written. Line 28, delete “dramatically”. Line 23, the authors state that “During the APEC (1 October to 31 December 2014) and Parade (1 August to 31 December 2015) sampling periods”, but in Figure1, 4, 6 and Line235-240, the study periods were from 18/10/2014-22/11/2014 and 01/08/2015-23/09/2015. Please give more clear and consistent definition of your research periods in your manuscript, such as during, before and after “APEC” or “Parade”, “AAPEC”, “APEC”, “BAPEC”, “AParade”, “Parade” and “BParade”.*

**Response to Detailed Comment 1:** Accepted. "Abstract" has been simplified. For the definition of our research periods, 1) the control periods of APEC and Parade are 03/11/2014-12/11/2014 and 20/08/2015-03/09/2015; 2) the APEC/Parade campaigns consist of before, during, and after APEC/Parade, from 18/10/2014-22/11/2014 and 01/08/2015-23/09/2015; 3) the sampling periods are 01/10/2014-31/12/2014 and 01/08/2015-31/12/2015, which are used to better match the statistical model (GLM). In correspondence, we give more clear and consistent definition of our research periods in the tables and figures.

**Changes in the Manuscript:** The sentence "We therefore developed a generalized linear regression model (GLM) to establish the relationship between the concentrations of air pollutants and meteorological parameters" has been deleted. The sentence "During the APEC (1 October to 31 December 2014) and Parade (1 August to 31 December 2015) sampling periods" has been deleted. The sentence "The concentrations of all pollutants except ozone decreased dramatically (by more than 20%) during both events, compared with the levels during non-control periods" has been deleted. The sentence

"(i.e. when the daily average wind speed (WS) was less than  $2.50 \text{ m s}^{-1}$  and planetary boundary layer (PBL) height was lower than 290 m)" has been deleted. The sentence " We found that the average  $\text{PM}_{2.5}$  concentration during APEC decreased by 45.7% compared with the period before APEC and by 44.4% compared with the period after APEC. This difference was attributed to emission reduction efforts during APEC" has been deleted.

Section 2.2 "Research Periods Definition and Control Strategies" is added to the manuscript. Please refer to Page 8 Line 168 to Page 9 Line 177.

**Detailed Comment 2:** *For the "Introduction" section, I suggest the authors move Table 1 and Table 2 and some related context to the "Methods" Section. Line 55, "(2013)" is the reference citation format correct? Please check the format of the references throughout the whole manuscript more carefully. Line 59 "2012 levels" to "level of 2012". Line 71-72, please cite some scientific literatures here instead of "(SEPB, 2010)", "(GEPB, 2009)" and "(CEPB, 2013)". Line 73-75, only need to define abbreviations at their first occurrence. e.g. "APEC", "Parade", "GLM" etc. Line 78, delete "control (Table 1)". Line 83 "from" to "to". Line 86-90, please rewrite these two sentences. You mean 54 % in Beijing, 26 % in Shijiazhuang, and 39 % in Tangshan. What is "the average concentration of total elements in  $\text{PM}_{2.5}$ "? Line 92, what is "before" represent? Line 95, delete "e.g."*

**Response to Detailed Comment 2:** Accepted. "the State Council of China (2013)" is equal to "(the State Council of China, 2013)". We have checked the format of the references throughout the whole manuscript. The air pollution control measures implemented for the events come from the public documents and some scientific literatures have been added.

**Changes in the Manuscript:** The control strategies in Table 1 (Table 2 at present) are moved to “Measurements and Methods”. Please refer to Page 9 Line 178-180 and Page 12 Line 237-242. “2012 levels” is changed to “levels of 2012”. Please refer to Page 3 Line 50. A number of scientific literatures are added to support the air pollution control measures implemented for the events. Please refer to Page 3 Line 61-63. The abbreviations of “APEC”, “Parade”, and “GLM” are used after being defined at their occurrence in “Abstract”. Please refer to Page 3 Line 64. The decreased ratios of the concentrations of total elements reported by Wen et al. (2016) are deleted. Please to Page 4 Line 73-75. In the study of Han et al. (2015), “before” is changed to “before APEC”. Please refer to Page 4 Line 77.

**Detailed Comment 3:** *For the “Measurement and Methods”, I just recommend the authors include the measurement, the research periods definition and control strategies, and the methods for the meteorological conditions separation in this section. Section 2.1, 2.2 and 2.3 can be combined, and some content in introduction and Section 3 can be moved to this part. Line 141, change to “the 4th Ring Road of Beijing”. Section 2.2, why the authors used the meteorological data from NCDC of the airport not the corresponding data from PKU site? Line 172, what is “AX105DR” represent for? Line 203-205, why define the variable WD? And what is the difference between (1) and (2). Line 208, change “Figure S2” to “Fig. S1”, the tables and the figures should be labeled separately. Line 216, use the equation editor to give the proper format of the formulas.*

**Response to Detailed Comment 3:** Accepted. The structure of “Measurement and Methods” is accordingly adjusted. We use the meteorological data from NCDC of the airport rather than the corresponding data from PKU site, because the data of WS and WD is influenced by the

building northern of the observation site and these two meteorological parameters might influence the pollutant concentrations significantly. The meteorological data from NCDC are integrated and continuous, which can represent the meteorological influences on the daily average pollutant concentrations at PKU site. "AX105DR" is the instrument model of the electronic balance. The definition of "variable WD" is given by the JetStream Glossary of NOAA ([http://www.srh.weather.gov/srh/jetstream/append/glossary\\_v.html](http://www.srh.weather.gov/srh/jetstream/append/glossary_v.html)). For the WD data of NCDC, it is invalid when the wind is calm or keeps fluctuating during a time period. Thus, the data of WD indicated with "calm and variable" are grouped into an independent category.

**Changes in the Manuscript:** The structure of "Measurement and Methods" is adjusted. "Measurements of Air Pollutants", "Meteorological Data", and "Analysis of the PM<sub>2.5</sub> Filter Samples" are combined into Section 2.1 "Measurements". Section 2.2 "Research Periods Definition and Control Strategies" is added. The introduction of the "stable meteorological condition" method is moved to "Measurement and Methods" and combined with the GLM method into Section 2.3 "Methods for the Meteorological Conditions Separation". Please refer to Page 6 Line 116, Page 8 Line 168 to Page 9 Line 180, and Page 9 Line 181 to Page 10 Line 196. "the fourth ring road" is replaced by "the 4<sup>th</sup> Ring Road of Beijing". Please refer to Page 6 Line 122. The citation of the JetStream Glossary of NOAA is added. Please refer to Page 10 Line 208-209.

**Detailed Comment 4:** *For Section 3, the authors are suggested to rearrange the structure of the manuscript and give in-depth discussions of the results, not just mentioned the results. Line 235-240, move the annotations to the figure captions and keep the annotations in the Figure and the main text consistent,*



such as “Before APEC” means “BAPEC” in the main text? Line245, delete “during the whole control period”. Line255-268, and Figure 2, the authors give detail explanations of the changes of the PM<sub>2.5</sub> components for the “AAPEC”, “APEC” and “BAPEC ” etc., in my opinion, Figure 2 revealed a part of information of Figure1, why the authors give this part of analysis? And why the components changes for different periods? Line284-289, change“(SNA)/PM<sub>2.5</sub>”to“(SNA/PM<sub>2.5</sub>)”. And why the proportion of SNA change like this? Line 290-296 Please give more clear and consistent definition of your research periods in your manuscript, such as during, before and after “APEC” or “Parade”, “AAPEC”, “APEC”, “BAPEC”, “AParade”, “Parade” and “BParade”. Line 311, add “(Fig. 1)” after sulphate information. Line 325-326 “during BParade and 326 AParade (25.7% and 20.3%, respectively).” to “during BParade (25.7%) and AParade (20.3%). Line 331-333, did the authors mean “the PBL heights during APEC and Parade were constantly high”, but during these two periods, the PBL heights sometimes were low, please rewrite this sentence to give more clear statement. Section 3.2.1, Move this part to the methods section. What is the theoretical basis of this identification method? This method from previous study or developed by the authors? Did the authors combined the data of APEC and Parade, why not give the identification separately? Line 383, add “(S3)” after “Supplementary Information” Line 398-497, this part just description of the figures and lacks in-depth discussions of the results. What is Similarities and differences of the changes for different species and what caused the results?

**Response to Detailed Comment 4:** Accepted. “BAPEC”, “APEC”, and “AAPEC” mean before, during, and after APEC; “BParade”, “Parade”, and “AParade” mean before, during, and after Parade.

We discuss the proportions of the measured components in PM<sub>2.5</sub> before, during, and after APEC/Parade. Although all the component concentrations

decrease during APEC and Parade, the proportions of different components in  $PM_{2.5}$  show different changing patterns. The proportions of OC and elements in  $PM_{2.5}$  tend to increase and the proportion of SNA in  $PM_{2.5}$  tends to decrease. This indicates that secondary formation of SNA from primary gaseous pollutants contributes to high pollution level significantly. During APEC/Parade, emission reduction results in decreased proportions of SNA and increased proportions of other components in  $PM_{2.5}$ .

The PBL heights increase on 5, 11, and 12 November during APEC and are mostly higher than 400 m during Parade. The identification of stable meteorological periods is based on the empirical and mathematical relationship between air pollution levels and both WS and PBL height. We combine the data of APEC and Parade so that different pollution levels can be included in the scattering plot for better influences of WS and PBL height on  $PM_{2.5}$ .

**Changes in the Manuscript:** “BAPEC”, “APEC”, and “AAPEC” are replaced by before, during, and after APEC; “BParade”, “Parade”, and “AParade” are replaced by before, during, and after Parade. Please refer to Page 13 Line 258-261, 268-270, and 272-273, Page 14 Line 300, and Page 15 Line 301, 306-308, 310-311, and 313-314. “during the whole control period” is deleted. Please refer to Page 12 Line 253. “(SNA)/ $PM_{2.5}$ ” is changed to “(SNA/ $PM_{2.5}$ )”. Please refer to Page 14 Line 296, 299, and 300. “(Figure 1)” is added after sulphate information. Please refer to Page 15 Line 322. The figures “The prevalence of WD during the APEC and Parade campaigns” and “Time series of daily average  $PM_{2.5}$  concentrations and PBL heights during the APEC and Parade campaigns” are moved to the supplement S3 and S4. “during BParade and AParade (25.7% and 20.3%, respectively)” is changed to “during BParade (25.7%) and AParade (20.3%)”. The statement of the PBL heights has been rewritten. Please refer to the supplement S3 and S4. The introduction of the

“stable meteorological condition” method is moved to “Measurements and Methods”. Please refer to Page 9 Line 182 to Page 10 Line 196. “(S6)” is added after “Supplementary Information”. Please refer to Page 17 Line 358.

The discussion of the results of the GLM method has been improved. Figure S4 (Figure 8 at present) is moved from the supplement to the manuscript in Section 3.3.1, showing the time series of the observed pollutant and GLM-predicted pollutant concentrations. Please refer to Page 18 Line 382-384. The description of the model results is emphasized. Table 8 is added to Section 3.3.2, summarizing the meteorological parameters included in the models and their influence on pollutant concentrations. Please refer to Page 21 Line 450 to Page 22 Line 462. The changes for different pollutant concentrations are further discussed. Please refer to Page 24 Line 496-499 and 506-509. Section 3.3.4 “Uncertainties of the GLM” is added to the manuscript. Please refer to Page 26 Line 544-557.

**Detailed Comment 5:** *Section 3.3 have structural problem, and I just recommend the authors adjust the manuscript in this section. Firstly, the authors should give a clear description of the model constructing and parameterization process (Table 8); Secondly, the authors should give the modeling results (FigureS4 should be moved to the main text) and give the validation check of the models (Figure 10-12); and then the authors can use the models to give the evaluations (this part in Section 3.3 is weak compared to the “stable meteorological condition method” and this part should be more emphasized in the manuscript). Line 548-550, “decreased by 58% and 63%” compared with what? Line 549-550, please correct the expressions like the following in the whole manuscript “the meteorological conditions and pollution control strategies contributed 30% and 28% to the reduction of the PM<sub>2.5</sub> concentrations during APEC 2014, respectively, and 38% and 25% during*

*Parade 2015, respectively". Did the authors mean the meteorological conditions decreased the PM<sub>2.5</sub> concentrations by 30% and pollution control strategies decreased the PM<sub>2.5</sub> concentration by 28%? Please check the manuscript and make more accurate statement. Line 568 and table 10, why the sulfate increased by 44%? The results is opposite to the "stable meteorological condition method" (Figure 9)?*

**Response to Detailed Comment 5:** Accepted. The structure of Section 3.3 is adjusted accordingly and the results of the GLM method have been more emphasized in the manuscript. We apply the GLM to predict air pollutant concentrations during APEC and Parade based on meteorological parameters. The difference between the observed and GLM-predicted concentrations is attributed to emission reduction through the implementation of air pollution control strategies.

The concentrations of sulphate are determined by primary emissions and secondary transformation from SO<sub>2</sub>; thus, the changes in sulphate concentrations may not reflect the effectiveness of emission control strategies. One needs to also include the changes in SO<sub>2</sub> concentrations by adding the concentration of total S to discussion.

**Changes in the Manuscript:** The structure of Section 3.3 is adjusted accordingly, including the model performance and cross-validation test, model description, quantitative estimates of the contribution of meteorological conditions to air pollutant concentrations, and uncertainties of the GLM. Please refer to Page 18 Line 380, Page 21 Line 430, Page 22 Line 463, and Page 26 Line 544. The assumption of the GLM is added when discussing the contributions of meteorological conditions and pollution control strategies to the reduction of pollutant concentrations. Please refer to Page 23 Line 479-480. The reduction of sulphate concentrations is discussed in the manuscript. Please refer to Page 24 Line 510 to Page 25 Line 524.

**Detailed Comment 6:** For figures and tables, the authors should give more accurate captions. Table 2, give the annotation of “AOD” (“AOT”), “(MODIS/MISR)” (what does it mean?), Table 3 add “in this study” after “in the GLM”, and clarified the minimum and maximum data is for daily or others? Table 4 give more accurate annotation of “BAPEC”, “APEC”, “AAPEC”, “Bparade”, “parade”, and “AParade”. Delete the ambiguous annotation “B: before; A: after”. The same for other tables and Figures. Figure 1 “grey-shaded” to “blue-shaded”, “Before APEC” to “BAPEC” and so on. Figure 8, what does this figure stand for? Not just give the explanations of “the black/red bars” or “the whiskers” stand for? Figure 9 delete “(SNA)” or “SNA=sulphate + nitrate + ammonium”. FigureS4 move this figure to the main text and give the exactly labels of the x-axis, use the date format not just “the sampling period”.

**Response to Detailed Comment 6:** Accepted. We give more accurate captions for figures and tables accordingly. Figure 8 (Figure 6 at present) stands for the improvements and uncertainties of the “stable meteorological condition” method, indicating that by considering only days with stable meteorological conditions, the uncertainties associated with the percentage reduction figures are reduced and the reliability of the changes of air pollutants concentrations are improved. However, uncertainties still remain.

**Changes in the Manuscript:** The annotations of “MODIS/MISR”, “MOD/MYD” are given in Table 2 (Table 1 at present). Please refer to Page 38 Line 828. “in this study” is added after “in the GLM” in Table 3. Please refer to Page 40 Line 834. More accurate annotations of “BAPEC”, “APEC”, “AAPEC”, “Bparade”, “parade”, and “AParade” are given in relevant tables and figures. “B: before; A: after” is replaced by “BAPEC/BParade: before APEC/Parade, AAPEC/AParade: after

APEC/Parade". Please refer to Page 41 Line 839-840 and Page 48 Line 882-883. "grey-shaded" is changed to "blue-shaded". Please refer to Page 47 Line 875. The caption of Figure 8 (Figure 6 at present) is modified, illustrating the purpose of the figure. Please refer to Page 52 Line 914-915. Figure S4 (Figure 8 at present) is moved from the supplement to the manuscript. Please refer to Page 54 Line 929. Figure S4 (Figure 8 at present) is moved from the supplement to the main text and the date format in the labels of x-axis is given. Please refer to Page 54 Line 927-929.

## Referee #2:

### Major Comments:

***Major Comment 1:** Why the authors chose the stable meteorological condition identification method to give the evaluation first? It seems GLM method is more effective for the meteorological influence separation. Which method is focused on?*

*If the stable meteorological condition identification method has limitations in quantifying the meteorological influences, why the authors give so many discussions on the quantifying results in this part, i.e. Line 393-436? Compared to the stable meteorological condition identification method, the GLM method mainly focused on the evaluation of the model performance and lack in-depth discussions.*

*Furthermore, the validations of the GLM method is still weak in the manuscript, the authors just compared the model results of  $PM_{2.5}$  in literatures, line 551-552. Please give more in-depth analysis for the results of GLM method*

**Response to Major Comment 1:** Agree. We focus on the GLM method rather than the “stable meteorological condition” method, because the GLM method has been proved to be more effective for the meteorological influence separation. We firstly introduce the “stable meteorological condition” method for the reasons as following. The “stable meteorological condition” method and the “statistical models (e.g. GLM)” method are two major methods to help separate the meteorological influences on pollutant concentrations in the former studies. The “stable meteorological condition” method is easier to achieved and more widely applied. However, there still exists limits of the application of the “stable meteorological condition” method that the stable

meteorological conditions are determined subjectively e.g. by meteorological maps and weather systems. Thus, we determine the days with stable meteorological conditions based on specific meteorological parameters of wind speed and PBL height quantitatively and evaluate the improvement of the “stable meteorological condition” method.

As a result, uncertainties of the “stable meteorological condition” method still remain in quantifying the meteorological influences, although the size of these uncertainties has been reduced. This may be due to the limited sample size on days with stable meteorological conditions during the control periods. It is therefore necessary to further quantify the meteorological influences with the GLM method. Indeed, the discussion of the results of the GLM method is weak compared to the “stable meteorological condition” method.

In fact, we give systematic validation check of the PM<sub>2.5</sub> GLM, including the R<sup>2</sup> values of the linear regression equations showing the correlations between GLM-predicted and observed concentrations of pollutants, and the results of the cross-validation test (Figure 10 (Figure 7 at present), Figure 11 (Figure 9 at present), and Table 7 (Table 5 at present)). As the referee suggested, the results of the GLM method have been more emphasized in the manuscript.

**Changes in the Manuscript:** The results of the “stable meteorological conditions” method is simplified in Section 3.2. Figure 5 (Figure S3 at present), Figure 6 (Figure S4 at present), and Table 5 (Table S5 at present) are moved from the main text. Please refer to Page 16 Line 331-333 and 340-342. The variations of pollutant concentrations under stable meteorological conditions in Figure 9 (Figure S8 at present) are simplified and moved from the main text. Please refer to Page 17 Line 351-356. Table 6 (Table S7 at present) is moved from the main text, listing the percentage differences among the mean PM<sub>2.5</sub> concentrations of four periods that are randomly selected from within the



non-control days of the APEC and Parade campaigns. Please refer to Page 18 Line 368-370.

The results of GLM method is emphasized in Section 3.3. The structure of Section 3.3 is adjusted accordingly, including the model performance and cross-validation test, model description, quantitative estimates of the contribution of meteorological conditions to air pollutant concentrations, and uncertainties of the GLM. Please refer to Page 18 Line 380, Page 21 Line 430, Page 22 Line 463, and Page 26 Line 544. Figure S4 (Figure 8 at present) is moved from the supplement to the manuscript in Section 3.3.1, showing the time series of the observed pollutant and GLM-predicted pollutant concentrations. Please refer to Page 18 Line 382-384. The description of the model results is emphasized. Table 8 is added to Section 3.3.2, summarizing the meteorological parameters included in the models and their influence on pollutant concentrations. Please refer to Page 21 Line 450 to Page 22 Line 462. The changes for different pollutant concentrations are further discussed. Please refer to Page 24 Line 496-499 and 506-509. Section 3.3.4 “Uncertainties of the GLM” is added to the manuscript. Please refer to Page 26 Line 544-557.

***Major Comment 2:*** *The authors are recommended to adjust the structure of the manuscript to give more clear and concise abstract and introduction. Some part of the “introduction” and “Results and discussions” can be moved to the method section. The “Results and discussions” should give more in-depth analysis without just give statement of the tables and Figures. See the following comments in detail.*

**Response to Major Comment 2:** Accepted. The “Abstract” and “Introduction” are modified to be clearer and more concise.

**Changes in the Manuscript:** For the “Abstract”, the variations of pollutant concentrations are deleted. The results of the “stable meteorological condition” method are deleted. Please refer to Page 2 Line 23-26. For the “Introduction”, Table 1 (Table 2 at present) is moved to “Measurements and Methods”. Please refer to Page 9 Line 178-180. For the “Measurements and Methods”, “Measurements of Air Pollutants”, “Meteorological Data”, and “Analysis of the PM<sub>2.5</sub> Filter Samples” are combined into Section 2.1 “Measurements”. Section 2.2 “Research Periods Definition and Control Strategies” is added. The introductions of the “stable meteorological condition” method has been moved to “Measurement and Methods” and combined with the GLM method into Section 2.3 “Methods for the Meteorological Conditions Separation”. Please refer to Page 6 Line 116, Page 8 Line 168 to Page 9 Line 180, and Page 9 Line 181 to Page 10 Line 196.

**Major Comment 3:** *Some annotations of the Figures and Tables should be more precise and accurate.*

**Response to Major Comment 3:** Accepted. Please refer to the following responses in detail.

**Changes in the Manuscript:** For the tables, “in the study” is added after “in the GLM” in Table 3. Please refer to Page 40 Line 834. “B:before; A: after” is replaced by “BAPEC/BParade: before APEC/Parade, AAPEC/AParade: after APEC/Parade” in Table 4. Please refer to Page 41 Line 839-840.

For the figures, “grey-shaded” is replaced by “blue-shaded” in Figure 1. Please refer to Page 47 Line 875. “B:before; A: after” is replaced by “BAPEC/BParade: before APEC/Parade, AAPEC/AParade: after APEC/Parade” in Figure 2. Please refer to Page 48 Line 882-883. “(SNA)/PM<sub>2.5</sub>” is changed to“(SNA/PM<sub>2.5</sub>)” in Figure 4. Please refer to Page 50 Line 894-895. “The

percentage reductions of pollutant concentrations under similar meteorological conditions.” is added in front of the annotation of Figure 8 (Figure 6 at present). Please refer to Page 52 Line 914-915.

**Detailed Comments:**

***Detailed Comment 1:** Line 47-48, this sentence is confusion and misunderstanding. If “meteorological conditions and pollution control strategies contributed 30% and 28% to the reduction of the PM<sub>2.5</sub> concentrations”, is there any other reason to cause the reduction? Please rewrite sentences like this in the manuscript.*

**Response to Detailed Comment 1:** Agree. The concentrations of air pollutants could be influenced by meteorological parameters, emission intensities, and chemical transformation. In our study, the results of the GLM method are based on the assumption that the pollutant concentrations are only the function of meteorological conditions and emission intensities during the control periods of APEC and Parade.

**Changes in the Manuscript:** The assumption that “the concentrations of air pollutants are only determined by meteorological conditions and emission intensities” is added after the reduction of the PM<sub>2.5</sub> concentrations. Please refer to Page 2 Line 38-39 and Page 23 Line 479-480.

***Detailed Comment 2:** Line 62-63, what do you mean here?*

**Response to Detailed Comment 2:** The long-term strategies cannot improve the air quality in the short term, thus it is difficult to evaluate the effectiveness of these strategies.

**Changes in the Manuscript:** “in the short term” is added after the sentence. Please refer to Page 3 Line 55.

***Detailed Comment 3:** Line64-80, the authors list the special events for air pollution control, are there related studies on these events? Please add some scientific references here.*

**Response to Detailed Comment 3:** Accepted. There are related studies on these events and the references have been added.

**Changes in the Manuscript:** “Huang et al., 2012” and “Liu et al., 2013” are added after the 41<sup>st</sup> Shanghai World Expo in 2010 and the 16<sup>th</sup> Guangzhou Asian Games and Asian Para Games in 2010. Please refer to Page 3 Line 61-63, Page 30 Line 659-662, and 665-667.

***Detailed Comment 4:** Line 90-91, the statement here is quite obscure. Please give a clear and accurate summary of the previous studies.*

**Response to Detailed Comment 4:** Accepted. The decreased ratios of the extinction and absorbance coefficients during APEC are compared with those before APEC.

**Changes in the Manuscript:** “before APEC” is added after the sentence. Please refer to Page 4 Line 77.

**Detailed Comment 5:** Line 95, add more references here to back your statement.

**Response to Detailed Comment 5:** Accepted. More references are added.

**Changes in the Manuscript:** “Calkins et al., 2016” is added. Please refer to Page 4 Line 80 and Page 29 Line 606-609.

**Detailed Comment 6:** Line 130-134, the authors give the advantages of the GLM methods. “(3) in addition to predicting  $PM_{2.5}$  mass concentrations, our model could also predict concentrations of gaseous pollutants and individual  $PM_{2.5}$  components.” Other methods cannot predict concentrations of gaseous pollutants and individual  $PM_{2.5}$  components? However, I think for most reader, they more concern about the correctness and effectiveness of the method.

**Response to Detailed Comment 6:** The concentrations of  $PM_{2.5}$ , gaseous pollutants, and individual components can be predicted precisely because of the corresponding models for different pollutants, solely based on meteorological conditions.

**Changes in the Manuscript:** “by corresponding models for different pollutants” is added after the sentence. Please refer to Page 12 Line 242.

**Detailed Comment 7:** Line 162-168, why the authors used the data from BCIA? Did the meteorological data can match with the observation data of the pollutants?

**Response to Detailed Comment 7:** We use the meteorological data from NCDC of the airport rather than the corresponding data from PKU site,

because the data of WS and WD may be influenced by the building northern of the observation site and these two meteorological parameters can influence the pollutant concentrations significantly. The meteorological data from NCDC are integrated and continuous, which can represent the meteorological influences on the daily average pollutant concentrations at PKU site.

**Changes in the Manuscript:** Please refer to the response of the comment.

***Detailed Comment 8:*** Line 183, “OCEC” to “OC/EC”.

**Response to Detailed Comment 8:** Accepted.

**Changes in the Manuscript:** “OCEC” has been changed to “OC/EC”. Please refer to Page 8 Line 161.

***Detailed Comment 9:*** Line201-205, why the authors define “variable WD” and separate to (1) and (2).

**Response to Detailed Comment 9:** The definition of “variable WD” is given by the JetStream Glossary of NOAA ([http://www.srh.weather.gov/srh/jetstream/append/glossary\\_v.html](http://www.srh.weather.gov/srh/jetstream/append/glossary_v.html)) rather than given by our study. For the WD data of NCDC, it is invalid when the wind is calm or keeps fluctuating during a time period. Thus, the data of WD indicated with “calm and variable” are grouped into an independent category.

**Changes in the Manuscript:** The statement of “the JetStream Glossary of NOAA” is added. Please refer to Page 10 Line 208-209.

**Detailed Comment 10:** *What the physical meaning of  $\beta_0$  i.e. in the intercept?*

**Response to Detailed Comment 10:** The non-linear functions are natural log transformed and introduced into the GLM, then the coefficients in the non-linear functions are transformed into  $\beta$ , including  $\beta_0$ ,  $\beta_{1k}$ ,  $\beta_{2k}$ ,  $\beta_{3k}$ , and  $\beta_{4k}$ , which represent the non-linear relationships between meteorological parameters and pollutant concentrations.

**Changes in the Manuscript:** Please refer to the response of the comment.

**Detailed Comment 11:** *Line 233, what is the study period? 2014.10.01-2014.12.31 and 2015.08.01-2015.12.31 not match with the data shown in Figure 1.*

**Response to Detailed Comment 11:** For the definition of our research periods, 1) the control periods of APEC and Parade are 03/11/2014-12/11/2014 and 20/08/2015-03/09/2015; 2) the APEC/Parade campaigns consist of before, during, and after APEC/Parade, from 18/10/2014-22/11/2014 and 01/08/2015-23/09/2015; 3) the sampling periods are 01/10/2014-31/12/2014 and 01/08/2015-31/12/2015, which are used to better match the statistical model (GLM). In correspondence, we give clearer and more consistent definition of our research periods in the tables and figures.

**Changes in the Manuscript:** Section 2.2 "Research Periods Definition and Control Strategies" is added. Please refer to Page 8 Line 168 to Page 9 Line 177.

**Detailed Comment 12:** *Line 255-268, what does the results imply?*

**Response to Detailed Comment 12:** The results imply the similarities of the chemical characteristics during these two events that the proportions of OC and elements in PM<sub>2.5</sub> tend to increase and the proportion of SNA in PM<sub>2.5</sub> tends to decrease during APEC and Parade.

**Changes in the Manuscript:** Please refer to the response of the comment.

*Detailed Comment 13: Line 276-278, “indicating that OC and EC were mainly derived from the same sources during both pollution control periods, and were from different sources during the non-control periods.” Why and how the sources changes?*

**Response to Detailed Comment 13:** Li et al. (2017) reported that the residential burning of coal and open and domestic combustion of wood and crop residuals could contribute to more than 50% of total organic aerosol of the North China Plain during winter. During the control periods, it might be difficult to fully control the emission of residential burning. The sources of OC and EC remain to be proved by referring to more studies researching into the source apportionment and distribution during these two events.

**Changes in the Manuscript:** The citation of “Li et al., 2017” is added to support the discussion of the sources of OC. Please refer to Page 14 Line 286-290 and Page 30 Line 668-672.

*Detailed Comment 14: Line 280-281, why the secondary OC (SOC) formation contribution from residential solid fuel (coal and biomass) are higher in the control period?*



**Response to Detailed Comment 14:** The control periods of APEC and Parade are 03/11/2014-12/11/2014 and 20/08/2015-03/09/2015, mainly during early winter and early autumn respectively. During the control periods, it might be difficult to fully control the emission of residential burning. Residential solid fuel, like bulk coal and biomass burning might contribute to the higher level of SOC formation (Liu et al., 2016).

**Changes in the Manuscript:** Please refer to the response of the comment.

***Detailed Comment 15: Line 341-353, what is the basis for this method?***

**Response to Detailed Comment 15:** The identification of stable meteorological periods is based on the empirical and mathematical relationship between air pollution levels and both WS and PBL height. The meteorological parameters of WS and PBL height are decided by the scatter plot and correlation between PM<sub>2.5</sub> concentrations and meteorological parameters shown in Figure S2.

**Changes in the Manuscript:** Please refer to the response of the comment.

***Detailed Comment 16: Line 568-597, please give in-depth discussion of the results. Why the authors use positive value to represent decrease? Why the sulfate increase during APEC?***

**Response to Detailed Comment 16:** Agree. The discussion of the results of the GLM method is weak compared to the “stable meteorological condition” method and it has been more emphasized in the manuscript.

We apply the GLM to predict air pollutant concentrations during APEC and Parade based on meteorological parameters. The difference between the observed and GLM-predicted concentrations, which is the positive value, is attributed to emission reduction through the implementation of air pollution control strategies.

The concentrations of sulphate are determined by primary emissions and secondary transformation from SO<sub>2</sub>; thus, the changes in sulphate concentrations may not reflect the effectiveness of emission control strategies. One needs to also include the changes in SO<sub>2</sub> concentrations by adding the concentration of total S to discussion.

**Changes in the Manuscript:** The results of GLM method is emphasized in Section 3.3. The structure of Section 3.3 is adjusted accordingly, including the model performance and cross-validation test, model description, quantitative estimates of the contribution of meteorological conditions to air pollutant concentrations, and uncertainties of the GLM. Please refer to Page 18 Line 380, Page 21 Line 430, Page 22 Line 463, and Page 26 Line 544. Figure S4 (Figure 8 at present) is moved from the supplement to the manuscript in Section 3.3.1, showing the time series of the observed pollutant and GLM-predicted pollutant concentrations. Please refer to Page 18 Line 382-384. The description of the model results has been emphasized. Table 8 is added to Section 3.3.2, summarizing the meteorological parameters included in the models and their influence on pollutant concentrations. Please refer to Page 21 Line 450 to Page 22 Line 462. The changes for different pollutant concentrations are further discussed. Please refer to Page 24 Line 496-499, 506-509. Section 3.3.4 “Uncertainties of the GLM” is added to the manuscript. Please refer to Page 26 Line 544-557.

## Reference

- Calkins, C., Ge, C., Wang, J., Anderson, M., and Yang, K.: Effects of meteorological conditions on sulfur dioxide air pollution in the North China Plain during winters of 2006–2015. *Atmos. Environ.*, 147, 296-309, doi:10.1016/j.atmosenv.2016.10.005, 2016.
- Han, T. T., Xu, W. Q., Chen, C., Liu, X. G., Wang, Q. Q., Li, J., Zhao, X. J., Du, W., Wang, Z. F., and Sun, Y. L.: Chemical apportionment of aerosol optical properties during the Asia-Pacific Economic Cooperation summit in Beijing, China, *J. Geophys. Res.*, 120, doi:10.1002/2015JD023918, 2015.
- Huang, X. F., He, L. Y., Xue, L., Sun, T. L., Zeng, L. W., Gong, Z. H., Hu, M., and Zhu, T.: Highly time-resolved chemical characterization of atmospheric fine particles during 2010 Shanghai World Expo, *Atmos. Chem. Phys.*, 12, 4897-4907, doi:10.5194/acp-12-4897-2012, 2012.
- Liu, H., Wang, X. M., Zhang, J. P., He, K. B., Wu, Y., and Xu, J. Y.: Emission controls and changes in air quality in Guangzhou during the Asian Games, *Atmos. Environ.*, 76, 81-93, doi:10.1016/j.atmosenv.2012.08.004, 2013.
- Li, H., Zhang, Q., Zhang, Q., Chen, C., Wang, L., Wei, Z., Zhou, S., Parworth, C., Zheng, B., and Canonaco, F.: Wintertime aerosol chemistry and haze evolution in an extremely polluted city of the North China Plain: significant contribution from coal and biomass combustion, *Atmos. Chem. Phys.*, 17, 1-31, doi:10.5194/acp-17-4751-2017, 2017.
- Liu, J., Mauzerall, D. L., Chen, Q., Zhang, Q., Song, Y., Peng, W., Klimont, Z., Qiu, X. H., Zhang, S. Q., Hu, M., Lin, W. L., Smith, K. R., and Zhu, T.: Air pollutant emissions from Chinese households: A major and underappreciated ambient pollution source, *P. Natl. Acad. Sci. USA.*, 113, 7756-7761, doi: 10.1073/pnas.1604537113, 2016.

Wen, W., Cheng, S., Chen, X., Wang, G., Li, S., Wang, X., and Liu, X.: Impact of emission control on PM and the chemical composition change in Beijing-Tianjin-Hebei during the APEC summit 2014, *Environ. Sci. Pollut. R.*, 23, 4509-4521, doi:10.1007/s11356-015-5379-5, 2016.

1 **The Role of Meteorological Conditions and Pollution Control**  
2 **Strategies in Reducing Air Pollution in Beijing during APEC 2014 and**  
3 **Parade 2015**

4 Pengfei Liang<sup>1</sup>, Tong Zhu<sup>1\*</sup>, Yanhua Fang<sup>1</sup>, Yingruo Li<sup>1,2</sup>, Yiqun Han<sup>1</sup>, Yusheng Wu<sup>1</sup>,  
5 Min Hu<sup>1</sup>, and Junxia Wang<sup>1</sup>

6 <sup>1</sup>SKL-ESPC and BIC-ESAT, College of Environmental Sciences and Engineering,  
7 Peking University, Beijing, 100871, China

8 <sup>2</sup>Environmental Meteorology Forecast Center of Beijing-Tianjin-Hebei, China  
9 Meteorological Administration, Beijing, 100089, China

10 \*Correspondence to: Tong Zhu (tzhu@pku.edu.cn)

11

12 **Abstract**

13 To control severe air pollution in China, comprehensive pollution control  
14 strategies have been implemented throughout the country in recent years. To evaluate  
15 the effectiveness of these strategies, the influence of meteorological conditions on  
16 levels of air pollution needs to be determined. Using the intensive air pollution control  
17 strategies implemented during the Asia-Pacific Economic Cooperation Forum in 2014  
18 (APEC 2014) and the Victory Parade for the Commemoration of the 70<sup>th</sup> Anniversary  
19 of the Chinese Anti-Japanese War and the World Anti-Fascist War in 2015 (Parade 2015)  
20 as examples, we estimated the role of meteorological conditions and pollution control

21 strategies in reducing air pollution levels in Beijing. Atmospheric particulate matter of  
22 aerodynamic diameter  $\leq 2.5 \mu\text{m}$  ( $\text{PM}_{2.5}$ ) samples were collected and gaseous pollutants  
23 ( $\text{SO}_2$ ,  $\text{NO}$ ,  $\text{NO}_x$ , and  $\text{O}_3$ ) were measured online at a site in Peking University (PKU). To  
24 determine the influence of meteorological conditions on the levels of air pollution, we  
25 first compared the air pollutant concentrations during days with stable meteorological  
26 conditions. However, there were few days with stable meteorological conditions during  
27 Parade. As such, we were unable to estimate the level of emission reduction efforts  
28 during this period. Finally, a generalized linear regression model (GLM) based only on  
29 meteorological parameters was built to predict air pollutant concentrations, which could  
30 explain more than 70% of the variation in air pollutant concentration levels, after  
31 incorporating the nonlinear relationships between certain meteorological parameters  
32 and the concentrations of air pollutants. Evaluation of the GLM performance revealed  
33 that the GLM, even based only on meteorological parameters, could be satisfactory to  
34 estimate the contribution of meteorological conditions in reducing air pollution, and  
35 hence the contribution of control strategies in reducing air pollution. Using the GLM,  
36 we found that the meteorological conditions and pollution control strategies contributed  
37 30% and 28% to the reduction of the  $\text{PM}_{2.5}$  concentration during APEC, and 38% and  
38 25% during Parade, based on the assumption that the concentrations of air pollutants  
39 are only determined by meteorological conditions and emission intensities. We also  
40 estimated the contribution of meteorological conditions and control strategies in  
41 reducing the concentrations of gaseous pollutants and  $\text{PM}_{2.5}$  components with the  
42 GLMs, revealing the effective control of anthropogenic emissions.

## 43 **1 Introduction**

44 Air pollution poses serious health risks to human populations and is one of the  
45 most important global environmental problems. To control air pollution in China, the  
46 State Council of China (2013) has released the Action Plan for Air Pollution Prevention  
47 and Control, which sets pollution control targets for different regions, e.g. atmospheric  
48 particulate matter of aerodynamic diameter  $\leq 2.5 \mu\text{m}$  (PM<sub>2.5</sub>) concentrations in 2017  
49 shall fall in Beijing–Tianjin–Hebei (BTH) by 25%, in the Yangtze River Delta by 20%,  
50 and in the Pearl River Delta by 15%, compared with the levels of 2012. To meet these  
51 targets, comprehensive pollution control strategies have been implemented at the  
52 national, provincial, and city levels. However, it is not clear how effective these  
53 strategies are in reducing air pollution. One of the challenges in evaluating the  
54 effectiveness of these strategies is that the long-term strategies cannot improve air  
55 quality in the short term. The efforts made to ensure satisfactory air quality for special  
56 events in the short term, such as the Beijing 2008 Olympics, provide a unique  
57 opportunity to evaluate the effectiveness of pollution control strategies (Kelly and Zhu,  
58 2016). During the Beijing Olympics comprehensive pollution control strategies were  
59 implemented intensively over a short period of time. Based on the successful experience  
60 during this event, the Chinese government implemented similar air pollution control  
61 measures for the 41<sup>st</sup> Shanghai World Expo in 2010 (Huang et al., 2012; SEPB, 2010),  
62 the 16<sup>th</sup> Guangzhou Asian Games and Asian Para Games in 2010 (GEPB, 2009; Liu et  
63 al., 2013), and the Chengdu Fortune Forum 2013 (CEPB, 2013). To ensure satisfactory  
64 air quality in Beijing during the two most recent events: APEC 2014 and Parade 2015,

65 the Chinese central government and the local government in Beijing, together with its  
66 surrounding provinces, implemented comprehensive air pollution control strategies.  
67 These two events provide a good opportunity to evaluate the effectiveness of air  
68 pollution control strategies.

69 One challenge when evaluating the effectiveness of air pollution control strategies  
70 over a short period of time is separating out the contribution of meteorological  
71 conditions to the reduction in air pollution levels.

72 Most previous studies have only provided a descriptive analysis of the changing  
73 concentrations of air pollutants during these events. Wen et al. (2016) reported that the  
74 average PM<sub>2.5</sub> concentration during APEC decreased by 54%, 26%, and 39% compared  
75 with the levels before APEC in Beijing, Shijiazhuang, and Tangshan, respectively. Han  
76 et al. (2015) observed that the extinction coefficient and absorbance coefficient  
77 decreased significantly during APEC compared with the values before APEC.

78 An increasing number of studies have recognized the importance of  
79 meteorological conditions in determining air pollution in Beijing and North China Plain  
80 (Calkins et al., 2016; Zhang et al., 2012). A northerly wind is considered to be  
81 favourable for pollutant diffusion, while a southerly wind is considered to be favourable  
82 for the transport of pollutants to Beijing (Zhang et al., 2014). When assessing the  
83 effectiveness of air pollution control strategies, a few studies have distinguished  
84 between the contribution of meteorological conditions and pollution control strategies  
85 in reducing air pollution by comparing air pollutant concentrations under similar  
86 meteorological conditions (Wang et al., 2015; Zhang et al., 2009). However, in these



87 studies, days with stable meteorological conditions were determined subjectively,  
88 which may introduce uncertainties and inconsistencies when estimating changes in air  
89 pollutant concentrations.

90 Statistical models have been developed to establish the relationship between air  
91 pollutant concentrations and meteorological parameters. Table 1 summarizes these  
92 models, with their respective  $R^2$  values. Multiple linear regression models have been  
93 widely applied to demonstrate the quantitative relationship between air pollutant  
94 concentrations and meteorological parameters, by assuming a linear relationship.  
95 However, these relationships are often non-linear (Liu et al., 2007; Liu et al., 2012).  
96 Most of the models with good explanation ( $R^2 > 0.6$ ) have actually adopted visibility,  
97 aerosol optical depth (AOD), and air quality index (AQI) as independent variables to  
98 improve the performance of the regression models (Liu et al., 2007; Sotoudeheian and  
99 Arhami, 2014; Tian and Chen, 2010; You et al., 2015). This could cause problems in  
100 the prediction of air pollutant concentrations during intensive emission control periods  
101 because visibility, AOD, and AQI are also dependent on air pollution levels; hence, the  
102 statistical models may not function when air pollutant levels are drastically reduced  
103 over a short period. A statistical model based solely on meteorological parameters to  
104 predict air pollutant concentrations is therefore required.

105 In this study, we used the air pollution control periods during APEC 2014 and  
106 Parade 2015 to estimate the role of meteorological conditions and pollution control  
107 strategies in reducing air pollution in the megacity of Beijing. We first measured the  
108 changes in air pollutant concentrations, including  $PM_{2.5}$ , gaseous pollutants, and the

109 components of PM<sub>2.5</sub>. We then estimated the role of meteorological conditions and  
110 pollution control strategies in reducing air pollution by comparing the pollutant  
111 concentrations during days with stable meteorological conditions. Finally, we  
112 developed a statistical model based only on meteorological parameters to evaluate the  
113 role of meteorological conditions and pollution control strategies in reducing the levels  
114 of air pollution in Beijing.

## 115 **2 Measurements and Methods**

### 116 **2.1 Measurements**

#### 117 **2.1.1 Measurements of Air Pollutants**

118 Gaseous pollutants (SO<sub>2</sub>, NO, NO<sub>x</sub>, and O<sub>3</sub>) were measured online, and PM<sub>2.5</sub>  
119 samples were collected on filters at an urban monitoring station in the campus of Peking  
120 University (39.99°N, 116.33°E) northwest of Beijing (Huang et al., 2010). The station  
121 is located on the roof of a six-floor building, about 20 m above the ground and about  
122 550 m north of the 4<sup>th</sup> Ring Road of Beijing.

123 A PM<sub>2.5</sub> four-channel sampler (TH-16A, Wuhan Tianhong Instruments Co., Ltd.,  
124 Hubei, China) was used to collect PM<sub>2.5</sub> samples. The sampling duration was 23.5 h  
125 (from 09:30 to 09:00 LT the next day). Both 47-mm quartz filters (QM/A, Whatman,  
126 Maidstone, England) and Teflon filters (PTFE, Whatman) were used. The flow rate was  
127 calibrated to 16.7 L min<sup>-1</sup> each week and a blank PM<sub>2.5</sub> sample was collected once a  
128 month. The quartz filters were baked at 550°C for 5.5 h before use. Immediately after  
129 collection, the filter samples were stored at -25°C until analysis.

130 Sulphur dioxide (SO<sub>2</sub>) was measured with an SO<sub>2</sub> analyzer (43i TL, Thermo Fisher  
131 Scientific, Waltham, MA, USA), with a precision of 0.05 ppb. Nitric oxide (NO) and  
132 nitrogen oxides (NO<sub>x</sub>) were measured with a NO-NO<sub>x</sub> analyzer (42i TL, Thermo Fisher  
133 Scientific), with precisions of 0.05 ppb for NO and 0.17 ppb for NO<sub>2</sub>. Ozone (O<sub>3</sub>) was  
134 measured with an O<sub>3</sub> analyzer (49i, Thermo Fisher Scientific), with a precision of 1.0  
135 ppb. The SO<sub>2</sub> and NO-NO<sub>x</sub> analyzers both had a detection limit of 0.05 ppb, and the O<sub>3</sub>  
136 analyzer had a detection limit of 0.50 ppb. All of the gaseous pollutant analyzers had a  
137 time resolution of 1 min, and were maintained and calibrated weekly following the  
138 manufacturer's protocols.

### 139 **2.1.2 Meteorological Data**

140 Meteorological data were obtained from the National Climate Data Center  
141 ([www.ncdc.noaa.gov](http://www.ncdc.noaa.gov)) dataset. The meteorological parameters were monitored at a  
142 station located in the Beijing Capital International Airport, and consisted of temperature  
143 (T), relative humidity (RH), wind direction (WD), wind speed (WS), sea level pressure  
144 (SLP), and precipitation (PREC). The PBL height was computed from the simulation  
145 results of the National Center for Environmental Prediction (NCEP) Global Data  
146 Assimilation System (GDAS) model ([www.ready.arl.noaa.gov/READYamet.php](http://www.ready.arl.noaa.gov/READYamet.php)).

### 147 **2.1.3 Analysis of the PM<sub>2.5</sub> Filter Samples**

148 To obtain daily average PM<sub>2.5</sub> mass concentrations, Teflon filters were weighed  
149 before and after sampling using an electronic balance, with a detection limit of 10 µg  
150 (AX105DR) in a super-clean lab (T: 20 ± 1°C, RH: 40 ± 3%). A portion of each Teflon

151 filter was extracted with ultrapure water for the measurement of water-soluble ions ( $\text{Na}^+$ ,  
152  $\text{NH}_4^+$ ,  $\text{K}^+$ ,  $\text{Mg}^{2+}$ ,  $\text{Ca}^{2+}$ ,  $\text{SO}_4^{2-}$ ,  $\text{NO}_3^-$ , and  $\text{Cl}^-$ ), with an ion-chromatograph (IC-2000 &  
153 2500, Dionex, Sunnyvale, CA, USA). The detection limits of  $\text{Na}^+$ ,  $\text{NH}_4^+$ ,  $\text{K}^+$ ,  $\text{Mg}^{2+}$ ,  
154  $\text{Ca}^{2+}$ ,  $\text{SO}_4^{2-}$ ,  $\text{NO}_3^-$ , and  $\text{Cl}^-$  were 0.03, 0.06, 0.10, 0.10, 0.05, 0.01, 0.01, and 0.03 mg  
155  $\text{L}^{-1}$ , respectively. A portion of each Teflon filter was digested with a solution consisting  
156 of nitric acid ( $\text{HNO}_3$ ), hydrochloric acid ( $\text{HCl}$ ), and hydrofluoric acid ( $\text{HF}$ ) for the  
157 measurement of trace elements (Na, Mg, Al, Ca, Mn, Fe, Co, Cu, Zn, Se, Mo, Cd, Ba,  
158 Tl, Pb, Th and U), with inductively coupled plasma-mass spectrometry (ICP-MS,  
159 Thermo X series, Thermo Fisher Scientific). The recoveries for all measured elements  
160 fell within  $\pm 20\%$  of the certified values. A semi-continuous organic carbon/elemental  
161 carbon (OC/EC) analyzer (Model 4, Sunset Laboratory, Tigard, OR, USA) was used to  
162 analyze organic and elemental carbon from a round punch (diameter: 17 mm) from each  
163 quartz filter sample. The T protocol of the National Institute for Occupational Safety  
164 and Health (NIOSH) thermal-optical method was applied (see details in Table S1).

165 All analytical instruments were calibrated before each series of measurements. The  
166  $R^2$  values of the calibration curves for ions, elements, and sucrose concentrations were  
167 higher than 0.999.

## 168 **2.2 Research Periods Definition and Control Strategies**

169 In our study, the APEC 2014 campaign consisted of three distinct periods: before  
170 APEC (18 October to 2 November 2014), during APEC (3 to 12 November 2014), and  
171 after APEC (13 to 22 November 2014). The Parade 2015 campaign was also divided

172 into three distinct periods: before Parade (1 to 19 August 2015), during Parade (20  
173 August to 3 September 2015), and after Parade (4 to 23 September 2015). A total of  
174 225 PM<sub>2.5</sub> filter samples were collected from 1 October to 31 December 2014 and from  
175 1 August to 31 December 2015. Sufficient number of sampling days are used to  
176 establish the relationship between air pollutant concentrations and meteorological  
177 parameters. 20 days of PM<sub>2.5</sub> samples were missed due to rain or sampler failures.

178 Table 2 shows the control periods and control strategies of APEC and Parade, ,  
179 including the control of emissions from traffic, industry, and coal combustion, as well  
180 as dust pollution.

## 181 **2.3 Methods for the Meteorological Conditions Separation**

### 182 **2.3.1 Identify Stable Meteorological Periods**

183 Stable conditions can be defined based on the relationship between air pollution  
184 levels and both WSs and PBL height. Figure 5 shows scatter plots between PM<sub>2.5</sub>  
185 concentrations and WS and PBL heights. The relationship can be fitted with a power  
186 function. A stable condition could be defined by identifying the turning points when the  
187 slopes changed from large to relatively small values, and stable conditions could be  
188 defined when WSs and PBL heights were lower than the values of the turning points.

189 The slopes of the power function were monotone, varying with no inflection point.  
190 Thus, we used piecewise functions to identify the turning points. As Figure 5 shows,  
191 the intersections of two fitting lines represented the turning points of the meteorological  
192 influence on PM<sub>2.5</sub>; thus, we defined days with stable meteorological conditions to be

193 those with a daily average WS less than  $2.50 \text{ m s}^{-1}$  and a daily average PBL height  
194 lower than 290 m. We could then compare the corresponding pollutant concentrations  
195 between days with stable meteorological conditions.

196 

### 197 **2.3.2 Generalized Linear Regression Model (GLM)**

198 A GLM was used to establish the relationship between air pollutant concentrations  
199 and meteorological parameters. The objective dependent variables included  
200 concentrations of  $\text{PM}_{2.5}$ , individual  $\text{PM}_{2.5}$  components, and gaseous pollutants.

201 To match the 23.5-h (09:30–09:00 LT the next day) sampling time of the  $\text{PM}_{2.5}$   
202 filter samples, meteorological parameters were averaged over the same time span (Table  
203 3) and used in the GLM alongside other parameters, e.g. the daily maximum of certain  
204 meteorological parameters. The meteorological parameters used in the GLM were T,  
205 RH, WD, WS, PBL height, SLP, and PREC. WDs were grouped into three categories,  
206 with relevant values and assigned to each category: north (NW, W and NE) as 1, south  
207 (SW, SE and E) as 2, and “calm and variable” as 3. A calm wind was defined as when  
208 the WS was less than  $0.5 \text{ m s}^{-1}$ . According to the JetStream Glossary of NOAA  
209 ([http://www.srh.weather.gov/srh/jetstream/append/glossary\\_v.html](http://www.srh.weather.gov/srh/jetstream/append/glossary_v.html)), a variable WD  
210 was defined as a condition when: (1) the WD fluctuated by  $60^\circ$  or more during a 2-min  
211 evaluation period, with a WS greater than 6 knots ( $11 \text{ km h}^{-1}$ ); or (2) the WD was  
212 variable and the WS was less than 6 knots ( $11 \text{ km h}^{-1}$ ).

213 A preliminary analysis showed that the concentrations of air pollutants and

214 meteorological parameters fitted best with an exponential function or power function  
215 (Figure S2); therefore, these functions were natural log transformed and introduced into  
216 the GLM.

217 We applied the stepwise method to evaluate the level of multicollinearity between  
218 the independent variables based on relevant judgement indexes, such as the variance  
219 inflation factor (VIF) or tolerance. Based on the assumption that the regression residuals  
220 followed a normal distribution and homoscedasticity, which is discussed in a later  
221 section, we developed the following model to calculate the concentrations of air  
222 pollutants and chemical components of PM<sub>2.5</sub> based on meteorological parameters:

$$223 \ln C_{ij} = \beta_0 + \sum_{k=1}^m \beta_{1k} x_k + \sum_{k=1}^n \beta_{2k} \ln x_k + \sum_{k=1}^{m'} \beta_{3k} x_k (lag) + \sum_{k=1}^{n'} \beta_{4k} \ln x_k (lag) \quad (1)$$

224 where  $C_{ij}$  is the concentration of the  $j^{th}$  air pollutant averaged over the  $i^{th}$  day,  $x_k$  is the  
225  $k^{th}$  meteorological parameter,  $\beta_k$  is the regression coefficient of the  $k^{th}$  meteorological  
226 parameter, and  $\beta_0$  is the intercept. For meteorological parameters containing both  
227 positive and negative values (i.e. T), only the exponential form was applied.  $m$ ,  $n$ ,  $m'$ ,  
228 and  $n'$  are the number of different forms of meteorological parameters that were  
229 eventually included in the model, and were determined based on the stepwise entering  
230 method of the regression model. The suffix of  $(lag)$  refers to the meteorological  
231 parameters of the previous day. The main assumption for equation (1) was that the  
232 concentrations of air pollutants were only a function of the meteorological parameters,  
233 and the emission intensities were constant. Hence, we only used the data before and  
234 after APEC 2014 and Parade 2015 control periods in equation (1), excluding the data  
235 collected during each period and during the heating season, e.g. after 15 November

236 2014.

237 Compared with the models used in previous studies (Table 1), our statistical model  
238 had the following advantages: (1) all of the independent variables were meteorological  
239 parameters; (2) we considered the non-linear relationships between air pollutant  
240 concentrations and meteorological parameters; and (3) in addition to predicting PM<sub>2.5</sub>  
241 mass concentrations, our model could also predict concentrations of gaseous pollutants  
242 and individual PM<sub>2.5</sub> components by corresponding models for different pollutants.

### 243 **3 Results and Discussion**

#### 244 **3.1 Changes of Air Pollutant Concentrations during the APEC 2014 and Parade** 245 **2015 Campaigns**

246 Figure 1 shows the time series of PM<sub>2.5</sub> and the concentrations of its components,  
247 as well as the meteorological parameters during the APEC 2014 and Parade 2015  
248 campaigns.

249 There were two pollution episodes during APEC, on 4 November and 7–10  
250 November 2014, which corresponded to two relatively stable periods with low WS,  
251 mainly from the south. The T declined gradually from 12.2°C before APEC to 4.9°C  
252 after APEC, and the RH was above 60% during the two pollution episodes. During  
253 Parade, the PM<sub>2.5</sub> concentrations were low, with the prevailing WD from the north and  
254 low WS. The T was mostly higher than 20°C, which differed from that during the APEC  
255 campaign when it was lower than 20°C.

256 Table 4 lists the mean concentrations and standard deviations of PM<sub>2.5</sub>, gaseous



257 pollutants, and PM<sub>2.5</sub> components during the APEC and Parade campaigns. The mean  
258 concentration of PM<sub>2.5</sub> during APEC was  $48 \pm 35 \mu\text{g m}^{-3}$ , 58% lower than before APEC  
259 ( $113 \pm 62 \mu\text{g m}^{-3}$ ), and 51% lower than after APEC ( $97 \pm 84 \mu\text{g m}^{-3}$ ). The mean  
260 concentration of PM<sub>2.5</sub> during Parade was  $15 \pm 6 \mu\text{g m}^{-3}$ , 63% lower than before Parade  
261 ( $41 \pm 14 \mu\text{g m}^{-3}$ ), and 62% lower than after Parade ( $39 \pm 28 \mu\text{g m}^{-3}$ ).

262 Figure 1 here

263 Figure 2 shows the proportion of the measured PM<sub>2.5</sub> components, including OC;  
264 EC; the sum of the sulphate, nitrate, and ammonia (SNA); and chloride ion (Cl<sup>-</sup>) and  
265 trace elements, which together accounted for 70–80% of the total PM<sub>2.5</sub> mass  
266 concentration. The proportions of OC (23.5%) and EC (3.5%) in PM<sub>2.5</sub> were highest  
267 during APEC. The proportion of SNA in PM<sub>2.5</sub> during APEC (40.6%) was lower than  
268 before APEC (50.7%) and higher than after APEC (37.2%). The proportions of Cl<sup>-</sup>  
269 (4.3%) and elements (6.8%) in PM<sub>2.5</sub> during APEC were higher than before APEC and  
270 lower than after APEC. For the Parade campaign, the proportions of OC (26.6%) and  
271 elements (6.6%) in PM<sub>2.5</sub> were highest during Parade. The proportions of EC (4.9%)  
272 and Cl<sup>-</sup> (1.1%) in PM<sub>2.5</sub> during Parade were higher than before Parade and lower than  
273 after Parade. The proportion of SNA in PM<sub>2.5</sub> was lowest during Parade (37.3%).  
274 Similarly, during the pollution control periods of APEC and Parade, the proportions of  
275 OC and elements in PM<sub>2.5</sub> tended to increase and the proportion of SNA in PM<sub>2.5</sub> tended  
276 to decrease.

277 Figure 2 here

278 EC is usually considered to be a marker of anthropogenic primary sources, while the

279 sources of OC include both primary and secondary organic aerosols. The correlation  
280 between OC and EC can reflect the origin of carbonaceous fractions (Chow et al., 1996).  
281 Figure 3 shows the correlation between EC and OC concentrations during the APEC  
282 and Parade campaigns. During the APEC and Parade campaigns, the correlation  
283 coefficient during both control periods ( $R^2 = 0.9032$ ) was larger than that during non-  
284 control periods ( $R^2 = 0.6468$ ), indicating that OC and EC were mainly derived from the  
285 same sources during both pollution control periods, and were from different sources  
286 during the non-control periods. Li et al. (2017) reported that the residential burning of  
287 coal and open and domestic combustion of wood and crop residuals could contribute to  
288 more than 50% of total organic aerosol of the North China Plain during winter. During  
289 the control periods, it might be difficult to fully control the emission of residential  
290 burning. The slope of the OC/EC correlation during the pollution control period was  
291 6.86, which was higher than that during the non-control period (3.97). This could be  
292 due to high levels of secondary OC (SOC) formation during the control periods, and/or  
293 the higher contribution from residential solid fuel (coal and biomass) burning (Liu et  
294 al., 2016).

295 Figure 3 here

296 Figure 4 shows the proportion of SNA in  $PM_{2.5}$  ( $\rho(SNA/PM_{2.5})$ ), the sulphur (S)  
297 oxidation ratio ( $SOR = [SO_4^{2-}]/([SO_2]+[SO_4^{2-}])$ ), and nitrogen oxidation ratio ( $NOR =$   
298  $[NO_3^-]/([NO_x]+[NO_3^-])$ ), along with  $PM_{2.5}$  concentrations during the APEC (a) and  
299 Parade (b) campaigns. During APEC, the average  $\rho(SNA/PM_{2.5})$  was 27%, which was  
300 significantly lower than before APEC (42%). During Parade, the average  $\rho(SNA/PM_{2.5})$

301 was 35%, which was also significantly lower than before Parade (47%).

302 During the APEC campaign, the average SO<sub>2</sub> concentration was 11.3 µg m<sup>-3</sup>  
303 before APEC, 9.5 µg m<sup>-3</sup> during APEC, and 34.8 µg m<sup>-3</sup> after APEC, respectively. The  
304 average NO<sub>x</sub> concentration was 151 µg m<sup>-3</sup> before APEC, 81 µg m<sup>-3</sup> during APEC, and  
305 220 µg m<sup>-3</sup> after APEC, respectively. During the Parade campaign, the average SO<sub>2</sub>  
306 concentration during Parade was 1.6 µg m<sup>-3</sup>, lower than both before Parade (2.7 µg m<sup>-3</sup>)  
307 and after Parade (5.9 µg m<sup>-3</sup>). The average NO<sub>x</sub> concentration was also lower during  
308 Parade (26 µg m<sup>-3</sup>), than before Parade (57 µg m<sup>-3</sup>) and after Parade (63 µg m<sup>-3</sup>).

309 During the APEC campaign, both the SOR and NOR declined gradually. The  
310 average SOR was 42%, 27%, and 17% before, during, and after APEC, respectively.  
311 The average NOR was 13%, 8%, and 5% before, during, and after APEC, respectively.  
312 SOR and NOR exhibited different patterns during the Parade campaign. The average  
313 SOR was 75%, 64%, and 55% before, during, and after Parade, respectively. The  
314 average NOR was 8%, 5%, and 8% before, during, and after Parade, respectively. The  
315 SOR was higher during the Parade campaign (64%) than during the APEC campaign  
316 (30%). For NOR, a higher average value was found during the APEC campaign (9%)  
317 than during the Parade campaign (7%).

318 The APEC campaign occurred during autumn and early winter, while the Parade  
319 campaign occurred during late summer and autumn. The active photochemical  
320 oxidation during the Parade campaign resulted in high SO<sub>2</sub>-to-sulphate transformation  
321 rates, as indicated by the high SOR. In addition, the higher RH in summer favoured the  
322 heterogeneous reaction of sulphate formation (Figure 1). For NOR, the T was higher

323 during Parade than during APEC, which favoured the volatilization of nitric acid and  
324 ammonia from the particulate phase of nitrate.

325 These results indicate significant reductions of air pollution during the pollution  
326 control periods of APEC 2014 and Parade 2015. However, it is necessary to evaluate if  
327 meteorological conditions contributed to this improvement.

328 Figure 4 here

### 329 **3.2 Variation of Air Pollutant Concentrations under Similar Meteorological** 330 **Conditions**

331 Figure S3 shows the prevalence of WD during the APEC and Parade campaigns.  
332 Figure S4 shows a time series of daily average PM<sub>2.5</sub> concentrations and PBL heights  
333 during the APEC and Parade campaigns. Both WS and PBL height during APEC and  
334 Parade were favourable for pollutant diffusion. Therefore, it is necessary to consider  
335 meteorological conditions when assessing the impacts of pollution control. One way to  
336 do this is to compare air pollution concentrations during periods when meteorological  
337 conditions were the same, i.e. under stable conditions (Wang et al., 2015; Zhang et al.,  
338 2009).

339 The days with stable meteorological conditions were determined with the method  
340 introduced in Section 3.2.1. As a result, eight days before APEC, six days during APEC,  
341 and seven days after APEC were defined as having stable meteorological conditions  
342 (Table S5).

343 Figure 6 shows the percentage reductions calculated by comparing the decreased  
344 average concentrations for all days during APEC to the average concentrations before

345 APEC in black bars, and the percentage reductions based on the days with stable  
346 meteorological conditions in red bars. For the difference between the periods during  
347 APEC and before APEC, the percentage reduction on days with stable meteorological  
348 conditions was much lower than the reduction calculated when considering all days,  
349 except for Ca and NO. This indicates that the method applied to days with stable  
350 meteorological conditions excluded part of the meteorological influence on pollutant  
351 concentrations. The average PM<sub>2.5</sub> concentration was 70 µg m<sup>-3</sup> during APEC, which  
352 represented a 45.7% decrease compared with the concentration in the BAPEC period  
353 (129 µg m<sup>-3</sup>) and a 44.4% decrease compared with the concentration in the AAPEC  
354 period (126 µg m<sup>-3</sup>) (Figure S8). Changes of other pollutant concentrations on days  
355 with stable meteorological conditions during the APEC campaign are shown in Figure  
356 S8.

357 The standard deviations were also calculated with an error transfer formula that is  
358 described in detail in the Supplementary Information (S6). Figure 6 shows that the  
359 standard deviations of the percentage reduction based on days with stable  
360 meteorological conditions decreased significantly. For example, the standard deviation  
361 of the percentage reduction in PM<sub>2.5</sub> based on the days with stable meteorological  
362 conditions decreased from 39% to 26% compared with the same measurement when all  
363 days were considered. This indicates that by considering only days with stable  
364 meteorological conditions, the uncertainties associated with the percentage reduction  
365 figures were reduced and the reliability of the changes of air pollutants concentrations  
366 were improved. However, uncertainties remain within the percentage differences based

367 on the days with stable meteorological conditions, although the size of these  
368 uncertainties was reduced. Table S7 lists the percentage differences among the mean  
369 PM<sub>2.5</sub> concentrations of four periods that were randomly selected from within the non-  
370 control days of the APEC and Parade campaigns. This may be due to the limited sample  
371 size on days with stable meteorological conditions during the APEC campaign. It is  
372 therefore necessary to further quantify the meteorological influences.

373 Figure 6 here

### 374 3.3 Emission Reductions during APEC and Parade Based on GLM Predictions

375 The previous section showed that the number of days with stable meteorological  
376 conditions could be limited; it was therefore impossible to estimate quantitatively the  
377 contribution of meteorological conditions to the reduction of air pollutant  
378 concentrations. We developed a GLM based only on meteorological parameters to meet  
379 this requirement.

#### 380 3.3.1 Model Performance and Cross-Validation Test

381 Figure 7 shows the scatter plot and correlation between the GLM-predicted and  
382 observed concentrations of air pollutants transformed to a natural log. Figure 8  
383 demonstrates the time series of the observed pollutant and GLM-predicted pollutant  
384 concentrations, which displayed a good correlation. The R<sup>2</sup> values of the linear  
385 regression equations ranged from 0.6638 to 0.8542, most of them are higher than 0.7  
386 except for Zn and Mn, indicating that the GLM-predicted concentrations correlated well  
387 with the observed concentrations. Specifically, the R<sup>2</sup> value of the linear regression

388 equation for PM<sub>2.5</sub> is as high as 0.8154.

389 **Figure 7 here**

390 **Figure 8 here**

391 Before applying the GLM to predict the air pollutant concentrations, the cross-  
392 validation (CV) method was used to evaluate the performance of the PM<sub>2.5</sub> model, with  
393 the assumption that it was representative of all air pollutants. The data input to the PM<sub>2.5</sub>  
394 model was allocated randomly into five equal periods, namely CV1, CV2, CV3, CV4,  
395 and CV5. For each test, one period was removed from the input data and the remaining  
396 data were applied to establish the CV model, which was then used to predict the PM<sub>2.5</sub>  
397 concentrations for the removed period. After five rounds, all input data were included  
398 in the CV test. **Figure 9** shows the time series of the observed and CV-predicted PM<sub>2.5</sub>  
399 concentrations, which demonstrates a good performance for the PM<sub>2.5</sub> GLM.

400 **Figure 9 here**

401 **Table 5** shows the CV-predicted PM<sub>2.5</sub> concentrations. The adjusted R<sup>2</sup> values  
402 for the five CV periods ranged from 0.710 to 0.807, which was lower than the value  
403 (0.808) derived from the PM<sub>2.5</sub> model, due to the lack of input data. The observed mean  
404 PM<sub>2.5</sub> concentrations were 94, 59, 44, 54, and 41 µg m<sup>-3</sup> for the five CV periods,  
405 respectively. The corresponding CV-predicted mean PM<sub>2.5</sub> concentrations were 82, 57,  
406 52, 65, and 47 µg m<sup>-3</sup>, respectively. The relative error (RE) between the observed mean  
407 PM<sub>2.5</sub> concentrations and the CV-predicted mean PM<sub>2.5</sub> concentrations ranged from -17%  
408 to 15%, with a mean RE of -5%. The RMSE of the RE was 14.6%, reflecting the  
409 uncertainties of the GLM method in quantitatively estimating the contribution of the

410 meteorological conditions to the air pollutant concentrations.

411 **Table 5** also lists the daily RMSE for each CV period and the total RMSE. The  
412 daily RMSE for each CV period was calculated with the daily average  $PM_{2.5}$   
413 concentrations during each CV period, and the total RMSE was calculated with the  
414 daily average  $PM_{2.5}$  concentration throughout all five CV periods combined. The daily  
415 RMSE ranged from 19 to  $53 \mu g m^{-3}$ , and the total RMSE was  $33 \mu g m^{-3}$ , indicating that  
416 the model prediction accuracy at the daily level needs to be improved. Liu et al. (2012)  
417 used a generalized additive model (GAM) to predict  $PM_{2.5}$ , which had a total daily  
418 RMSE of  $23 \mu g m^{-3}$ . Compared with their results, the CV performance in our study was  
419 satisfactory considering that the independent variables in our model were only based  
420 on meteorological parameters, while the model of Liu et al. (2012) included AOD.

421 The relative error calculated with the CV method for GLM was  $-5\%$  (**Table 5**),  
422 which was smaller than the mean percentage difference ( $-16\%$ ) calculated based on  
423 days with stable meteorological conditions (**Table S7**). Moreover, the RMSE of relative  
424 error calculated with the CV method for GLM (**Table 5**) was  $14.6\%$ , which was also  
425 smaller than the RMSE of percentage difference ( $18\%$ ) calculated based on days with  
426 stable meteorological conditions (**Table S7**).

427 These indicate that the GLM reduced uncertainties of the method in  
428 quantitatively estimating the contribution of the meteorological conditions to the  
429 pollutant concentrations.



### 430 3.3.2 Model Description

431 Table 6 shows the concentrations of air pollutants for the GLM with adjusted  $R^2$   
432 values higher than 0.6. The adjusted  $R^2$  of the  $PM_{2.5}$ ,  $NO_3^-$ ,  $NH_4^+$ , and  $SO_2$  models are  
433 higher than 0.8, indicating that these models could explain more than 80% of the  
434 variation in air pollutant concentrations.

435 Again, we used the  $PM_{2.5}$  model as an example. Table 7 lists the output indexes  
436 of the  $PM_{2.5}$  GLM, including a model summary, analysis of variance (ANOVA),  
437 coefficients, and other indexes. The values of  $R$ ,  $R^2$ , and adjusted  $R^2$  were 0.910, 0.828,  
438 and 0.808, respectively, indicating that the  $PM_{2.5}$  model can explain 80.8% of the  
439 variability of the daily average  $PM_{2.5}$  concentrations. The model was statistically  
440 significant according to the p-value ( $<0.05$ ) from an F-test, and the meteorological  
441 parameters eventually selected as the independent variables of the model were  
442 statistically significant according to the p-values ( $<0.05$ ) from a t-test. The  
443 meteorological parameters eventually included in the model were  $\ln WS$ ,  $\ln WS_{\max(\text{lag})}$ ,  
444  $PBL_{\max}$ ,  $PREC$ ,  $\ln \Delta T_{(\text{lag})}$ ,  $WS_{\text{mode}}$ ,  $WD/WS_{(\text{lag})}$ ,  $PBL_{\min(\text{lag})}$ ,  $PREC_{(\text{lag})}$ , and  $SLP_{\min}$ .  
445 According to the collinearity statistics, all the VIF values were within 5 and tolerance  
446 values were larger than 0.1, indicating that no serious multicollinearity existed between  
447 the independent parameters. The Durbin–Watson value (1.910) was close to 2,  
448 accounting for the good independence of the variance. Figure S9 shows the graphic  
449 residual analysis of the  $PM_{2.5}$  GLM.

450 Table 8 summarizes the meteorological parameters included in the models and  
451 their influence on pollutant concentrations. As a result,  $PBL$ ,  $WS_{(\text{lag})}$ ,  $PREC_{(\text{lag})}$ ,  $PREC$ ,

452 and WS are included in the models more frequently, accounting for 13, 9, 8, 7, and 7  
453 times. This indicates that these parameters have important influence on pollutant  
454 concentrations, especially for PBL included in all of the models. The parameters of the  
455 previous day also have important influence on pollutant concentrations, i.e.  $WS_{(lag)}$ ,  
456  $PREC_{(lag)}$ ,  $PBL_{(lag)}$ ,  $RH_{(lag)}$ ,  $T_{(lag)}$ ,  $WD/WS_{(lag)}$ , and  $WD_{(lag)}$ . Meteorological parameters  
457 have different influence on pollutant concentrations (Table 8). For example, PBL,  
458  $WS_{(lag)}$ , and  $PREC_{(lag)}$  represent the negative correlation with pollutant concentrations.  
459 This may be because the higher values of these meteorological parameters are in favour  
460 of pollution diffusion. On the contrary, RH, T,  $WD/WS_{(lag)}$ , and WD represent the  
461 positive correlation with pollutant concentrations, because the higher values of these  
462 meteorological parameters are beneficial for pollution formation and accumulation.

### 463 **3.3.3 Quantitative Estimates of the Contribution of Meteorological Conditions to** 464 **Air Pollutant Concentrations**

465 We applied the GLM to predict air pollutant concentrations during APEC 2014  
466 and Parade 2015 based on meteorological parameters. The difference between the  
467 observed and GLM-predicted concentrations was attributed to emission reduction  
468 through the implementation of air pollution control strategies.

469 Table 9 lists the percentage differences between the observed and GLM-predicted  
470 concentrations of air pollutants during APEC and Parade. The mean concentrations of  
471 the observed and predicted  $PM_{2.5}$  were 48 and 67  $\mu g m^{-3}$  during APEC, i.e. a 28%  
472 difference. The mean concentrations of the observed and predicted  $PM_{2.5}$  were 15 and  
473 20  $\mu g m^{-3}$  during Parade, i.e. a 25% difference. These differences are attributed to the

474 emission reduction through the implementation of air pollution control strategies. As  
475 described in Section 3.1, during APEC and Parade, the mean concentrations of PM<sub>2.5</sub>  
476 decreased by 58% and 63% compared with before APEC and Parade. Therefore, the  
477 meteorological conditions and pollution control strategies contributed 30% and 28% to  
478 the reduction of the PM<sub>2.5</sub> concentration during APEC 2014, and 38% and 25% during  
479 Parade 2015, based on the assumption that the concentrations of air pollutants are only  
480 determined by meteorological conditions and emission intensities.

481 The emission reduction during APEC in this study is comparable to the results of  
482 other studies where meteorological influences were considered. For example, the PM<sub>2.5</sub>  
483 concentration decreased by 33% under the same weather conditions during APEC in  
484 Beijing as modelled by the Weather Research and Forecasting model and Community  
485 Multiscale Air Quality (WRF/CMAQ) model (Wu et al., 2015). In addition, emission  
486 control implemented in Beijing during APEC resulted in a 22% reduction in the PM<sub>2.5</sub>  
487 concentration, as modelled by WRF-Chem (Guo et al., 2016).

488 Same as PM<sub>2.5</sub>, the differences listed in Table 9 for other pollutants show the  
489 reduction in emission of these pollutants and/or their precursors. The differences for EC  
490 were 37% (from 2.7 to 1.7 µg m<sup>-3</sup>) during APEC and 33% (from 1.2 to 0.8 µg m<sup>-3</sup>)  
491 during Parade. In contrast, the differences for OC were 11% (from 12.6 to 11.2 µg m<sup>-3</sup>)  
492 during APEC and 8% (from 3.7 to 4.0 µg m<sup>-3</sup>) during Parade. The differences for  
493 carbonaceous components (OC + EC) were 16% (from 15.3 to 12.9 µg m<sup>-3</sup>) during  
494 APEC and 2% (from 4.9 to 4.8 µg m<sup>-3</sup>) during Parade. This indicates that the emission  
495 reduction for OC and its precursors were smaller than the reduction of EC during APEC

496 and Parade. This may be because OC can originate from both primary emission and  
497 secondary transformation. The slope of the OC/EC correlation during the pollution  
498 control period reached 6.86 (Figure 3), indicating the higher levels of secondary OC  
499 (SOC) formation during the control periods.

500 Table 9 also shows the differences for sulphate were 44% (from 2.7 to 3.9  $\mu\text{g m}^{-3}$ )  
501 during APEC and 50% (from 5.2 to 2.6  $\mu\text{g m}^{-3}$ ) during Parade. The differences for  
502 nitrate were 44% (from 19.0 to 10.6  $\mu\text{g m}^{-3}$ ) during APEC and 56% (from 3.4 to 1.5  $\mu\text{g}$   
503  $\text{m}^{-3}$ ) during Parade. The differences for ammonium were 13% (from 5.5 to 4.8  $\mu\text{g m}^{-3}$ )  
504 during APEC and 38% (from 2.4 to 1.5  $\mu\text{g m}^{-3}$ ) during Parade. In total, the differences  
505 for SNA were 29% (from 27.2 to 19.3  $\mu\text{g m}^{-3}$ ) during APEC and 49% (from 11.0 to 5.6  
506  $\mu\text{g m}^{-3}$ ) during Parade. The control of the SNA concentration was very effective during  
507 APEC and Parade, leading to a significant decrease of  $\text{PM}_{2.5}$  during both events. The  
508 significant differences for sulphate and nitrate may indicate the control of coal  
509 combustion and/or vehicle emission were effective during APEC and Parade.

510 The concentration of sulphate is determined by primary emissions and secondary  
511 transformation from  $\text{SO}_2$ ; thus, the changes in sulphate concentrations may not well  
512 reflect the effectiveness of emission control strategies. One needs to also include the  
513 changes in  $\text{SO}_2$  concentrations. By adding the molar concentrations of  $\text{SO}_2$  and  $\text{SO}_4^{2-}$   
514 ( $\text{S} = [\text{SO}_2] + [\text{SO}_4^{2-}]$ ), the concentration of total S was calculated. Table 9 shows the  
515 differences for  $\text{SO}_2$  were 50% (from 6.59 to 3.32 ppb) during APEC and 2% (from 0.56  
516 to 0.57 ppb) during Parade, while the differences for total S were 41% (from 0.322 to  
517 0.189  $\mu\text{mol m}^{-3}$ ) during APEC and 33% (from 0.079 to 0.053  $\mu\text{mol m}^{-3}$ ) during Parade.

518 Coal combustion emissions is the major contributor to total S, this demonstrates the  
519 effective control of coal combustion during both APEC 2014 and Parade 2015. The  
520 difference for SO<sub>2</sub> during APEC was larger than that during Parade, while the difference  
521 for sulphate during Parade was larger than that during APEC. As discussed in Section  
522 3.1, the mean SOR was 27% and 64% during APEC and Parade, respectively, indicating  
523 that the SO<sub>2</sub>-to-sulphate transformation rate during APEC (autumn and early winter)  
524 was much lower than during Parade (late summer and autumn).

525 **Table 9** shows NO<sub>x</sub> and other PM<sub>2.5</sub> components also had significant emission  
526 reduction during APEC 2014 and Parade 2015. The differences between the observed  
527 and GLM-predicted concentrations of NO<sub>x</sub> were 56% (from 102 to 45 ppb) during  
528 APEC and 35% (from 20 to 13 ppb) during Parade. The differences for Cl<sup>-</sup> were 20%  
529 (from 2.58 to 2.06 μg m<sup>-3</sup>) during APEC and 6% (from 0.17 to 0.16 μg m<sup>-3</sup>) during  
530 Parade. The differences for K<sup>+</sup> were 37% (from 1.03 to 0.65 μg m<sup>-3</sup>) during APEC and  
531 25% (from 0.24 to 0.18 μg m<sup>-3</sup>) during Parade. The differences for Pb, Zn, and Mn  
532 ranged from 21% to 53% during APEC and Parade. The concentrations of Cl<sup>-</sup> have  
533 been found to be high in the fine particles produced from coal combustion (Takuwa et  
534 al., 2006), while the concentrations of K<sup>+</sup> are high in particles derived from combustion  
535 activities, e.g. biomass burning and coal combustion. Lead is typically considered to be  
536 a marker of emissions from coal combustion, power stations, and metallurgical plants  
537 (Dan et al., 2004; Mukai et al., 2001; Schleicher et al., 2011). Zinc can be produced by  
538 the action of a car braking and by tire wearing (Cyrus et al., 2003; Sternbeck et al.,  
539 2002). Manganese mainly originates from industrial activities. Major sources of NO<sub>x</sub>

540 emissions include power plants, industry, and transportation (Liu and Zhu, 2013). The  
541 differences for the concentrations of total S, Cl<sup>-</sup>, K<sup>+</sup>, Pb, Zn, Mn, and NO<sub>x</sub>, indicate that  
542 the control of anthropogenic emissions, especially coal combustion, was very effective  
543 during APEC and Parade.

### 544 **3.3.4 Uncertainties of the GLM**

545 In this study, the uncertainties of the GLM when estimating the contributions of  
546 meteorological conditions and pollution control strategies in reducing air pollution were  
547 assessed with the method of cross-validation test (Table 5) in Section 3.3.1. All the  
548 GLMs were developed following the same procedure, thus the PM<sub>2.5</sub> model was used  
549 as an example representative of all the pollutants. As a result, the relative error between  
550 the observed mean PM<sub>2.5</sub> concentrations and the CV-predicted mean PM<sub>2.5</sub>  
551 concentrations were within ±20%, averaging with -5%. This indicates that the PM<sub>2.5</sub>  
552 concentrations could be predicted with the GLM based on the meteorological  
553 conditions. The uncertainties of the GLM could refer to the RMSE of relative error for  
554 GLM of 14.6% (Table 5). It should be mentioned that the data input to the PM<sub>2.5</sub> model  
555 was allocated randomly into several periods, thus the RMSE of relative error for GLM  
556 would vary accordingly. In the future, we could test the uncertainties of the GLMs for  
557 other pollutants with the CV test.

## 558 **4 Conclusions**

559 During the pollution control periods of APEC 2014 and Parade 2015, the  
560 concentrations of air pollutants except ozone decreased dramatically compared with the

561 concentrations during non-control periods, accompanied by meteorological conditions  
562 favourable for pollutant dispersal.

563 To estimate the contributions of meteorological conditions and pollution control  
564 strategies in reducing air pollution, comparing the concentrations of air pollutants  
565 during days with stable meteorological conditions is a useful method, but has limitation  
566 due to high uncertainty and lack of a sufficient number of days with stable  
567 meteorological conditions

568 Our study shows that, if including the nonlinear relationship between  
569 meteorological parameters and air pollutant concentrations, GLMs based only on  
570 meteorological parameters could provide a good explanation of the variation of  
571 pollutant concentrations, with adjusted  $R^2$  values mostly larger than 0.7. Since the  
572 GLMs contained no parameters dependent on air pollution levels as independent  
573 variables, they could be used to estimate the contributions of meteorological conditions  
574 and pollution control strategies to the air pollution levels during emission control  
575 periods.

576 With the GLMs method, we found meteorological conditions and pollution control  
577 strategies played almost equally important roles in reducing air pollution in megacity  
578 Beijing during APEC 2014 and Parade 2015, e.g. 30% and 28% to the reduction of the  
579  $PM_{2.5}$  concentration during APEC 2014, as well as 38% and 25% during Parade 2015.  
580 We also found that the control of the SNA concentration was more effective than  
581 carbonaceous components. The differences between the observed and GLM-predicted  
582 concentrations of specific pollutants ( $Cl^-$ ,  $K^+$ , Pb, Zn, Mn,  $NO_x$ , and S) related to coal

583 combustion and industrial activities revealed the effective control of anthropogenic  
584 emissions.

585 In the future, combining the methods of source apportionment, the contributions  
586 of emission reductions for different sources in reducing air pollution could be estimated,  
587 enabling further analysis of pollution control strategies.

588

589 **Data availability.** The data of stationary measurements are available upon requests.

590 **Author contribution.** T. Zhu and P. F. Liang designed the experiments. P. F. Liang  
591 collected and weighed the PM<sub>2.5</sub> filter samples. P. F. Liang, Y. H. Fang, Y. Q. Han, and  
592 J. X. Wang carried out the analysis of the components in PM<sub>2.5</sub>. Y. S. Wu and M. Hu  
593 provided the data of gaseous pollutant concentrations. Y. R. Li computed the data of  
594 planetary boundary layer heights from GDAS and P. F. Liang developed the GLM. J.  
595 X. Wang managed the data. P. F. Liang analyzed the data with contributions from all  
596 co-authors. P. F. Liang prepared the manuscript with helps from T. Zhu.

597 **Acknowledgement.** This study was supported by the National Natural Science  
598 Foundation Committee of China (41421064, 21190051), the European 7th Framework  
599 Programme Project PURGE (265325), and the Collaborative Innovation Center for  
600 Regional Environmental Quality.

## 601 Reference

602 Barmpadimos, I., Keller, J., Oderbolz, D., Hueglin, C., and Prevot, A. S. H.: One decade  
603 of parallel fine (PM<sub>2.5</sub>) and coarse (PM<sub>10</sub>-PM<sub>2.5</sub>) particulate matter measurements



604 in Europe: trends and variability, *Atmos. Chem. Phys.*, 12, 3189-3203,  
605 doi:10.5194/acp-12-3189-2012, 2012.

606 Calkins, C., Ge, C., Wang, J., Anderson, M., and Yang, K.: Effects of meteorological  
607 conditions on sulfur dioxide air pollution in the North China Plain during winters  
608 of 2006–2015. *Atmos. Environ.*, 147, 296-309,  
609 doi:10.1016/j.atmosenv.2016.10.005, 2016.

610 CEPB: Chengdu Environmental Protection Bureau, available at:  
611 [http://www.cdepb.gov.cn/cdepbws/Web/Template/GovDefaultInfo.aspx?cid=236](http://www.cdepb.gov.cn/cdepbws/Web/Template/GovDefaultInfo.aspx?cid=236&aid=22738)  
612 &aid=22738 (last assess: 25 May 2017), (in Chinese), 2013.

613 China, S. C. o., State Council of P. R. China's notification on Action Plan for Air  
614 Pollution Prevention and Control. 2013.

615 Chitranshi, S., Sharma, S. P., and Dey, S.: Spatio-temporal variations in the estimation  
616 of PM<sub>10</sub> from MODIS-derived aerosol optical depth for the urban areas in the  
617 Central Indo-Gangetic Plain, *Meteorol. Atmos. Phys.*, 127, 107-121,  
618 doi:10.1007/s00703-014-0347-z, 2015.

619 Chow, J. C., Watson, J. G., Lu, Z. Q., Lowenthal, D. H., Frazier, C. A., Solomon, P. A.,  
620 Thuillier, R. H., and Magliano, K.: Descriptive analysis of PM<sub>2.5</sub> and PM<sub>10</sub> at  
621 regionally representative locations during SJVAQS/AUSPEX, *Atmos. Environ.*,  
622 30, 2079-2112, doi 10.1016/1352-2310(95)00402-5, 1996.

623 Chudnovsky, A. A., Koutrakis, P., Kloog, I., Melly, S., Nordio, F., Lyapustin, A., Wang,  
624 Y. J., and Schwartz, J.: Fine particulate matter predictions using high resolution  
625 Aerosol Optical Depth (AOD) retrievals, *Atmos. Environ.*, 89, 189-198,  
626 doi:10.1016/j.atmosenv.2014.02.019, 2014.

627 Cyrus, J., Heinrich, J., Hoek, G., Meliefste, K., Lewne, M., Gehring, U., Bellander, T.,  
628 Fischer, P., Van Vliet, P., Brauer, M., Wichmann, H. E., and Brunekreef, B.:  
629 Comparison between different traffic-related particle indicators: Elemental carbon  
630 (EC), PM<sub>2.5</sub> mass, and absorbance, *J. Expo. Anal. Env. Epid.*, 13, 134-143,  
631 doi:10.1038/sj.jea.7500262, 2003.

632 Dan, M., Zhuang, G. S., Li, X. X., Tao, H. R., and Zhuang, Y. H.: The characteristics of  
633 carbonaceous species and their sources in PM<sub>2.5</sub> in Beijing, *Atmos. Environ.*, 38,  
634 3443-3452, doi:10.1016/j.atmosenv.2004.02.052, 2004.

635 Diaz-Robles, L. A., Ortega, J. C., Fu, J. S., Reed, G. D., Chow, J. C., Watson, J. G., and  
636 Moncada-Herrera, J. A.: A hybrid ARIMA and artificial neural networks model to  
637 forecast particulate matter in urban areas: The case of Temuco, Chile, *Atmos.*  
638 *Environ.*, 42, 8331-8340, doi:10.1016/j.atmosenv.2008.07.020, 2008.

639 GEPB: Guangzhou Environmental Protection Bureau, available at:  
640 <http://www.gz.gov.cn/gzgov/s2812/200912/163197.shtml> (last assess: 25 May  
641 2017), (in Chinese), 2009.

642 Guo, J. P., He, J., Liu, H. L., Miao, Y. C., Liu, H., and Zhai, P. M.: Impact of various

643 emission control schemes on air quality using WRF-Chem during APEC China  
644 2014, *Atmos. Environ.*, 140, 311-319, doi:10.1016/j.atmosenv.2016.05.046, 2016.

645 Han, T. T., Xu, W. Q., Chen, C., Liu, X. G., Wang, Q. Q., Li, J., Zhao, X. J., Du, W.,  
646 Wang, Z. F., and Sun, Y. L.: Chemical apportionment of aerosol optical properties  
647 during the Asia-Pacific Economic Cooperation summit in Beijing, China, *J.*  
648 *Geophys. Res.*, 120, doi:10.1002/2015JD023918, 2015.

649 Hien, P. D., Bac, V. T., Tham, H. C., Nhan, D. D., and Vinh, L. D.: Influence of  
650 meteorological conditions on PM<sub>2.5</sub> and PM<sub>2.5-10</sub> concentrations during the  
651 monsoon season in Hanoi, Vietnam, *Atmos. Environ.*, 36, 3473-3484,  
652 doi:10.1016/S1352-2310(02)00295-9, 2002.

653 Huang, X. F., He, L. Y., Hu, M., Canagaratna, M. R., Sun, Y., Zhang, Q., Zhu, T., Xue,  
654 L., Zeng, L. W., Liu, X. G., Zhang, Y. H., Jayne, J. T., Ng, N. L., and Worsnop, D.  
655 R.: Highly time-resolved chemical characterization of atmospheric submicron  
656 particles during 2008 Beijing Olympic Games using an Aerodyne High-Resolution  
657 Aerosol Mass Spectrometer, *Atmos. Chem. Phys.*, 10, 8933-8945,  
658 doi:10.5194/acp-10-8933-2010, 2010.

659 Huang, X. F., He, L. Y., Xue, L., Sun, T. L., Zeng, L. W., Gong, Z. H., Hu, M., and Zhu,  
660 T.: Highly time-resolved chemical characterization of atmospheric fine particles  
661 during 2010 Shanghai World Expo, *Atmos. Chem. Phys.*, 12, 4897-4907,  
662 doi:10.5194/acp-12-4897-2012, 2012.

663 Kelly, F. J. and Zhu, T.: Transport solutions for cleaner air, *Science*, 352, 934-936,  
664 doi:10.1126/science.aaf3420, 2016.

665 Liu, H., Wang, X. M., Zhang, J. P., He, K. B., Wu, Y., and Xu, J. Y.: Emission controls  
666 and changes in air quality in Guangzhou during the Asian Games, *Atmos. Environ.*,  
667 76, 81-93, doi:10.1016/j.atmosenv.2012.08.004, 2013.

668 Li, H., Zhang, Q., Zhang, Q., Chen, C., Wang, L., Wei, Z., Zhou, S., Parworth, C.,  
669 Zheng, B., and Canonaco, F.: Wintertime aerosol chemistry and haze evolution in  
670 an extremely polluted city of the North China Plain: significant contribution from  
671 coal and biomass combustion, *Atmos. Chem. Phys.*, 17, 1-31, doi:10.5194/acp-17-  
672 4751-2017, 2017.

673 Liu, J., Mauzerall, D. L., Chen, Q., Zhang, Q., Song, Y., Peng, W., Klimont, Z., Qiu, X.  
674 H., Zhang, S. Q., Hu, M., Lin, W. L., Smith, K. R., and Zhu, T.: Air pollutant  
675 emissions from Chinese households: A major and underappreciated ambient  
676 pollution source, *P. Natl. Acad. Sci. USA.*, 113, 7756-7761, doi:  
677 10.1073/pnas.1604537113, 2016.

678 Liu, J., and Zhu, T.: NO<sub>x</sub> in Chinese Megacities, *Nato. Sci. Peace. Secur.*, 120, 249-263,  
679 doi:10.1007/978-94-007-5034-0\_20, 2013.

680 Liu, W., Li, X. D., Chen, Z., Zeng, G. M., Leon, T., Liang, J., Huang, G. H., Gao, Z. H.,  
681 Jiao, S., He, X. X., and Lai, M. Y.: Land use regression models coupled with

682 meteorology to model spatial and temporal variability of NO<sub>2</sub> and PM<sub>10</sub> in  
683 Changsha, China, *Atmos. Environ.*, 116, 272-280,  
684 doi:10.1016/j.atmosenv.2015.06.056, 2015.

685 Liu, Y., Franklin, M., Kahn, R., and Koutrakis, P.: Using aerosol optical thickness to  
686 predict ground-level PM<sub>2.5</sub> concentrations in the St. Louis area: A comparison  
687 between MISR and MODIS, *Remote. Sens. Environ.*, 107, 33-44,  
688 doi:10.1016/j.rse.2006.05.022, 2007.

689 Liu, Y., He, K. B., Li, S. S., Wang, Z. X., Christiani, D. C., and Koutrakis, P.: A  
690 statistical model to evaluate the effectiveness of PM<sub>2.5</sub> emissions control during  
691 the Beijing 2008 Olympic Games, *Environ. Int.*, 44, 100-105,  
692 doi:10.1016/j.envint.2012.02.003, 2012.

693 Mukai, H., Tanaka, A., Fujii, T., Zeng, Y. Q., Hong, Y. T., Tang, J., Guo, S., Xue, H. S.,  
694 Sun, Z. L., Zhou, J. T., Xue, D. M., Zhao, J., Zhai, G. H., Gu, J. L., and Zhai, P. Y.:  
695 Regional characteristics of sulfur and lead isotope ratios in the atmosphere at  
696 several Chinese urban sites, *Environ. Sci. Technol.*, 35, 1064-1071,  
697 doi:10.1021/es001399u, 2001.

698 Mustaffa, N. I. H., Latif, M. T., Ali, M. M., and Khan, M. F.: Source apportionment of  
699 surfactants in marine aerosols at different locations along the Malacca Straits,  
700 *Environ. Sci. Pollut. R.*, 21, 6590-6602, doi:10.1007/s11356-014-2562-z, 2014.

701 Nguyen, T. T. N., Bui, H. Q., Pham, H. V., Luu, H. V., Man, C. D., Pham, H. N., Le, H.  
702 T., and Nguyen, T. T.: Particulate matter concentration mapping from MODIS  
703 satellite data: a Vietnamese case study, *Environ. Res. Lett.*, 10, 095016,  
704 doi:10.1088/1748-9326/10/9/095016, 2015.

705 NOAA Air Resources Laboratory: <http://ready.arl.noaa.gov/READYamet.php/>.

706 Raman, R. S. and Kumar, S.: First measurements of ambient aerosol over an  
707 ecologically sensitive zone in Central India: Relationships between PM<sub>2.5</sub> mass,  
708 its optical properties, and meteorology, *Sci. Total. Environ.*, 550, 706-716,  
709 doi:10.1016/j.scitotenv.2016.01.092, 2016.

710 Richmond-Bryant, J., Saganich, C., Bukiewicz, L., and Kalin, R.: Associations of PM<sub>2.5</sub>  
711 and black carbon concentrations with traffic, idling, background pollution, and  
712 meteorology during school dismissals, *Sci. Total. Environ.*, 407, 3357-3364,  
713 doi:10.1016/j.scitotenv.2009.01.046, 2009.

714 Schleicher, N., Norra, S., Dietze, V., Yu, Y., Fricker, M., Kaminski, U., Chen, Y., and  
715 Cen, K.: The effect of mitigation measures on size distributed mass concentrations  
716 of atmospheric particles and black carbon concentrations during the Olympic  
717 Summer Games 2008 in Beijing, *Sci. Total. Environ.*, 412, 185-193,  
718 doi:10.1016/j.scitotenv.2011.09.084, 2011.

719 SEPB: Shanghai Environmental Protection Bureau, available at:  
720 <http://www.sepb.gov.cn/fa/cms/shhj//shhj2272/shhj2159/2010/02/20671.htm> (last

721 assess: 25 May 2017), (in Chinese), 2010.

722 Sotoudeheian, S. and Arhami, M.: Estimating ground-level PM<sub>10</sub> using satellite remote  
723 sensing and ground-based meteorological measurements over Tehran, *J. Environ.*  
724 *Health. Sci.*, 12, 122, doi:10.1186/S40201-014-0122-6, 2014.

725 Sternbeck, J., Sjodin, A., and Andreasson, K.: Metal emissions from road traffic and  
726 the influence of resuspension-results from two tunnel studies, *Atmos. Environ.*, 36,  
727 4735-4744, doi:10.1016/S1352-2310(02)00561-7, 2002.

728 Takuwa, T., Mkilaha, I. S. N., and Naruse, I.: Mechanisms of fine particulates formation  
729 with alkali metal compounds during coal combustion, *Fuel*, 85, 671-678,  
730 doi:10.1016/j.fuel.2005.08.043, 2006.

731 Tao, J., Gao, J., Zhang, L., Zhang, R., Che, H., Zhang, Z., Lin, Z., Jing, J., Cao, J., and  
732 Hsu, S. C.: PM<sub>2.5</sub> pollution in a megacity of southwest China: source  
733 apportionment and implication, *Atmos. Chem. Phys.*, 14, 8679-8699,  
734 doi:10.5194/acp-14-8679-2014, 2014.

735 Tian, J. and Chen, D. M.: A semi-empirical model for predicting hourly ground-level  
736 fine particulate matter (PM<sub>2.5</sub>) concentration in southern Ontario from satellite  
737 remote sensing and ground-based meteorological measurements, *Remote. Sens.*  
738 *Environ.*, 114, 221-229, doi:10.1016/j.rse.2009.09.011, 2010.

739 Wang, Z. S., Li, Y. T., Chen, T., Li, L. J., Liu, B. X., Zhang, D. W., Sun, F., Wei, Q.,  
740 Jiang, L., and Pan, L. B.: Changes in atmospheric composition during the 2014  
741 APEC conference in Beijing, *J. Geophys. Res.*, 120, 12695-12707,  
742 doi:10.1002/2015JD023652, 2015.

743 Wen, W., Cheng, S., Chen, X., Wang, G., Li, S., Wang, X., and Liu, X.: Impact of  
744 emission control on PM and the chemical composition change in Beijing-Tianjin-  
745 Hebei during the APEC summit 2014, *Environ. Sci. Pollut. R.*, 23, 4509-4521,  
746 doi:10.1007/s11356-015-5379-5, 2016.

747 Wu, Q., Xu, W., and Wang, Z.: The air quality forecast about PM<sub>2.5</sub> before and during  
748 APEC 2014 in Beijing by WRF-CMAQ model system, EGU General Assembly  
749 Conference, 2015.

750 Yanosky, J. D., Paciorek, C. J., Laden, F., Hart, J. E., Puett, R. C., Liao, D. P., and Suh,  
751 H. H.: Spatio-temporal modeling of particulate air pollution in the conterminous  
752 United States using geographic and meteorological predictors, *Environ. Health.*,  
753 13, 63, doi:10.1186/1476-069x-13-63, 2014.

754 You, W., Zang, Z. L., Pan, X. B., Zhang, L. F., and Chen, D.: Estimating PM<sub>2.5</sub> in Xi'an,  
755 China using aerosol optical depth: A comparison between the MODIS and MISR  
756 retrieval models, *Sci. Total. Environ.*, 505, 1156-1165,  
757 doi:10.1016/j.scitotenv.2014.11.024, 2015.

758 Zhang, J. P., Zhu, T., Zhang, Q. H., Li, C. C., Shu, H. L., Ying, Y., Dai, Z. P., Wang, X.,  
759 Liu, X. Y., Liang, A. M., Shen, H. X., and Yi, B. Q.: The impact of circulation

760 patterns on regional transport pathways and air quality over Beijing and its  
761 surroundings, *Atmos. Chem. Phys.*, 12, 5031-5053, doi:10.5194/acp-12-5031-  
762 2012, 2012.

763 Zhang, X. Y., Wang, Y. Q., Lin, W. L., Zhang, Y. M., Zhang, X. C., Gong, S., Zhao, P.,  
764 Yang, Y. Q., Wang, J. Z., Hou, Q., Zhang, X. L., Che, H. Z., Guo, J. P., and Li, Y.:  
765 Changes of atmospheric composition and optical properties over Beijing 2008  
766 Olympic monitoring campaign, *B. Am. Meteorol. Soc.*, 90, 1633,  
767 doi:10.1175/2009BAMS2804.1, 2009.

768 Zhang, W., Zhu, T., Yang, W., Bai, Z., Sun, Y. L., Xu, Y., Yin, B., and Zhao, X.:  
769 Airborne measurements of gas and particle pollutants during CAREBeijing-2008,  
770 *Atmos. Chem. Phys.*, 14, 301-316, doi:10.5194/acp-14-301-2014, 2014.

771 **Figure Captions:**

772

773 Figure 1. Time series of atmospheric particulate matter of aerodynamic diameter  $\leq 2.5$   
774  $\mu\text{m}$  ( $\text{PM}_{2.5}$ ) and the concentrations of its components, wind direction (WD), wind speed  
775 (WS), temperature (T), and relative humidity (RH) before, during, and after (a) APEC  
776 2014 and (b) Parade 2015. The blue-shaded areas highlight the pollution control periods  
777 of APEC 2014 (3 November to 12 November 2014) and Parade 2015 (20 August to 3  
778 September 2015).

779

780 Figure 2. Proportions of the measured components in  $\text{PM}_{2.5}$  during (a) APEC 2014 and  
781 (b) Parade 2015 campaigns, including organic carbon (OC), elemental carbon (EC),  
782  $\text{SO}_4^{2-}$ ,  $\text{NO}_3^-$ ,  $\text{NH}_4^+$ ,  $\text{Cl}^-$  and elements. BAPEC/BParade: before APEC/Parade,  
783 AAPEC/AParade: after APEC/Parade.

784

785 Figure 3. Scatter plot and correlations between organic carbon (OC: y-axis) and  
786 elemental carbon (EC: x-axis) concentrations of  $\text{PM}_{2.5}$  during the APEC 2014 and  
787 Parade 2015 campaigns. The red symbols denote the non-control period and the black  
788 symbols denote the pollution control period. The linear regression equations and  $R^2$   
789 values are given for these two campaigns.

790

791 Figure 4. Upper panel: time series of the proportion of sulphate, nitrate, and ammonia  
792 (SNA) in  $\text{PM}_{2.5}$  ( $\rho(\text{SNA}/\text{PM}_{2.5})$ ) and  $\text{PM}_{2.5}$  mass concentrations (the black bar  
793 represents  $\text{PM}_{2.5}$  concentration and the red line represents  $\rho(\text{SNA}/\text{PM}_{2.5})$ ). Middle panel:  
794  $\text{SO}_2$ ,  $\text{SO}_4^{2-}$ , and SOR ( $[\text{SO}_4^{2-}]/([\text{SO}_2]+[\text{SO}_4^{2-}])$ ). Lower panel:  $\text{NO}_x$ ,  $\text{NO}_3^-$ , and NOR

795  $([\text{NO}_3^-]/([\text{NO}_x]+[\text{NO}_3^-]))$ . Data collected during the (a) APEC 2014 and (b) Parade  
796 2015 campaigns. The hollow bars represent gaseous pollutants (red for  $\text{SO}_2$ , blue for  
797  $\text{NO}_x$ ), and solid bars represent secondary inorganic ions (red for sulphate, blue for  
798 nitrate).

799

800 **Figure 5.** Scatter plot showing the correlation between daily  $\text{PM}_{2.5}$  concentrations (y-  
801 axis) and (a) daily PBL heights (x-axis) and (b) daily WSs (x-axis) during **the sampling**  
802 **periods**. The red and black scattered points represent different distribution areas. The  
803 piecewise function regression equations and the corresponding values of PBL height  
804 and WS according to the intersections are given.

805

806 **Figure 6.** The percentage reductions of pollutant concentrations under similar  
807 **meteorological conditions**. The black bars represent the percentage reductions  
808 calculated by comparing the decreased average concentrations during APEC to the  
809 average concentrations before APEC. The red bars represent the percentage reductions  
810 calculated by comparing the decreased average concentrations during APEC to the  
811 average concentrations before APEC based only on the days with stable meteorological  
812 conditions. The whiskers represent the standard deviations of the percentage reductions.

813

814 **Figure 7.** Scatter plot and correlations between GLM-predicted (y-axis) and observed  
815 (x-axis) concentrations of pollutants transformed to a natural log. The linear regression  
816 equations and  $R^2$  values are given.

817

818 Figure 8. Time series of the observed (in black line) and GLM-predicted pollutant  
819 concentrations (in red line).

820

821 Figure 9. Time series of the observed and cross-validation (CV) predicted  $PM_{2.5}$   
822 concentrations during five CV periods. The black line represents the observed  $PM_{2.5}$   
823 concentration and the red line represents the CV-predicted  $PM_{2.5}$  concentration.

824

825

826



827 **Table 1.** Summary of statistical models applied to predict air pollutant concentrations  
 828 with meteorological parameters.

| Dependent variables                                            | Independent variables                                                                                                                                          | R <sup>2</sup>                                                                   | Methods <sup>1</sup> | Applications                  |
|----------------------------------------------------------------|----------------------------------------------------------------------------------------------------------------------------------------------------------------|----------------------------------------------------------------------------------|----------------------|-------------------------------|
| PM <sub>2.5</sub>                                              | meteorological parameters (T/RH/PBL/WS/cloud fraction), AOT                                                                                                    | 0.47                                                                             | MLR                  | Gupta and Christopher, 2009   |
| PM <sub>10</sub>                                               | meteorological parameters (T/WD/RH/PBL/WS), AOD                                                                                                                | 0.21/0.30 (MODIS/MISR <sup>2</sup> )                                             | MLR                  | Sotoudeheian and Arhami, 2014 |
| PM <sub>10</sub>                                               | meteorological parameters (RH/WS/T), AOD                                                                                                                       | 0.49-0.88 (spatial-temporal variability)                                         | MLR                  | Chitranshi et al., 2015       |
| PM <sub>2.5</sub>                                              | meteorological parameters (T/RH/PREC), AOT                                                                                                                     | 0.60/0.58 (MOD/MYD <sup>3</sup> )                                                | MLR                  | Nguyen et al., 2015           |
| ln(PM <sub>2.5</sub> ),<br>ln(PM <sub>2.5-10</sub> )           | meteorological parameters (ln(PREC)/ln(RH)/ln(WS)/ln(SUN)/ln(T)), atmospheric turbulence parameters (ln( $\Delta u/\Delta z$ )/ln( $\Delta \theta/\Delta z$ )) | 0.60-0.74                                                                        | GLM                  | Hien et al., 2002             |
| ln(PM <sub>2.5</sub> )                                         | meteorological parameters (T/WD/ln(WS)/ln(PBL)), ln(AOT), categorical parameters                                                                               | 0.51/0.62 (MODIS/MISR)                                                           | GLM                  | Liu et al., 2007              |
| log(PM <sub>2.5</sub> ),<br>log(BC)                            | meteorological parameters (T/wind index), traffic-related parameters                                                                                           | 0.62/0.42 (PM <sub>2.5</sub> /BC)                                                | GLM                  | Richmond-Bryant et al., 2009  |
| ln(PM <sub>2.5</sub> )                                         | meteorological parameters (ln(PBL)/GEO-4 RH/ln(surface RH)/T), ln(AOD)                                                                                         | 0.65                                                                             | GLM                  | Tian and Chen, 2010           |
| ln(PM <sub>10</sub> )                                          | meteorological parameters (T/WD/RH/ln(PBL)/ln(WS)), ln(AOD)                                                                                                    | 0.18/0.38 (MODIS/MISR)                                                           | GLM                  | Sotoudeheian and Arhami, 2014 |
| ln(PM <sub>2.5</sub> )                                         | meteorological parameters (ln(PBL)/RH/Vis/ln(T)/ln(WS)), ln(AOD)                                                                                               | 0.67/0.72 (MODIS/MISR)                                                           | GLM                  | You et al., 2015              |
| ln(PM <sub>2.5</sub> )                                         | meteorological parameters (WS/WD/T/RH/pressure), optical properties (absorption/scattering/attenuation coefficient)                                            | 0.54/0.31/0.32/0.88 (winter/pre-monsoon/monsoon/post-monsoon)                    | GLM                  | Raman and Kumar, 2016         |
| PM <sub>10</sub> , PM <sub>2.5</sub>                           | smooth non-parametric functions of spatial/temporal variates                                                                                                   | 0.58                                                                             | GAM                  | Barnpadimos et al., 2012      |
| PM <sub>2.5</sub> , PM <sub>10</sub> ,<br>PM <sub>2.5-10</sub> | smooth non-parametric functions of spatial/temporal variates                                                                                                   | 0.77/0.58/0.46-0.52 (PM <sub>2.5</sub> /PM <sub>10</sub> /PM <sub>2.5-10</sub> ) | GAM                  | Yanosky et al., 2014          |
| PM <sub>10</sub>                                               | meteorological parameters (WS/T <sub>min</sub> /T <sub>max</sub> ), previous day PM <sub>10</sub>                                                              | 0.78                                                                             | ANN                  | Diaz-Robles et al., 2008      |
| PM <sub>2.5</sub>                                              | meteorological parameters (WS/RH/PBL/WS*PBL), AOD, spatial                                                                                                     | 0.89                                                                             | LUR                  | Chudnovsky et al., 2014       |

---

|                                    |                                                                                                                                                                |                                                |     |                  |
|------------------------------------|----------------------------------------------------------------------------------------------------------------------------------------------------------------|------------------------------------------------|-----|------------------|
| PM <sub>10</sub> , NO <sub>2</sub> | explanatory variables<br>meteorological parameters (T/RH/WS/air<br>pressure/cloud cover/percentage of<br>haze/mist/rain/sun), spatial explanatory<br>variables | 0.45/0.43 (PM <sub>10</sub> /NO <sub>2</sub> ) | LUR | Liu et al., 2015 |
|------------------------------------|----------------------------------------------------------------------------------------------------------------------------------------------------------------|------------------------------------------------|-----|------------------|

---

<sup>1</sup>MLR: multiple linear regression model, GLM: generalized linear regression model, GAM: generalized additive model, ANN: artificial neural networks, LUR: land use regression model.

<sup>2</sup>MODIS: Moderate resolution imaging spectroradiometer, MISR: Multi-angle imaging spectroradiometer.

<sup>3</sup>MOD/MYD: MODIS Terra (AM overpass) and Aqua (PM overpass).

829

830

831 **Table 2.** Air pollution control strategies during APEC 2014 and Parade 2015.

| Periods                                                                                                              | Control measures            | Detail of measures                                                                                                                                                                                                                                                                    |
|----------------------------------------------------------------------------------------------------------------------|-----------------------------|---------------------------------------------------------------------------------------------------------------------------------------------------------------------------------------------------------------------------------------------------------------------------------------|
| <b>APEC 2014</b><br>(3 to 12<br>November<br>2014) and<br><b>Parade 2015</b><br>(20 August to<br>3 September<br>2015) | Traffic control             | The odd/even plate number rule for traffic control in Beijing, Tianjin, Hebei and Shandong; 70% (APEC 2014)/80% (Parade 2015) of official vehicle and “yellow label vehicles” were banned from Beijing’s roads; Trucks limited to run inside the 6th Ring Road between 6 AM to 24 PM. |
|                                                                                                                      | Industrial emission control | More than 10,000 factories production limited or halted in Beijing and Hebei, Tianjin, Shandong, Shanxi and Inner Mongolia which surround Beijing city.                                                                                                                               |
|                                                                                                                      | Dust pollution control      | Dust emission factories and outdoor constructions shut down or limited in Beijing and near area; Enhancing road cleaning and spray and aspirating in Beijing.                                                                                                                         |
|                                                                                                                      | Coal-fired control          | State-owned enterprise productions enhancing limited and 40% coal-fired boilers shut down in Beijing; more special pollutant emission factory limited around Beijing.                                                                                                                 |

832

833

834 Table 3. Meteorological parameters used in the GLM in this study. The calculation of  
 835 each meteorological parameter is based on the sample duration of 23.5 h (09:30–09:00  
 836 LT the next day).

| Parameters                          | Abbreviations        | Description                                         |
|-------------------------------------|----------------------|-----------------------------------------------------|
| Wind direction value*               | WD                   | The average of wind direction values.               |
|                                     | WD <sub>sum</sub>    | The sum of wind direction values.                   |
|                                     | WD <sub>mode</sub>   | The mode of wind direction values.                  |
| Wind speed (m s <sup>-1</sup> )     | WS                   | The average of wind speed.                          |
|                                     | WS <sub>mode</sub>   | The mode of wind speed.                             |
|                                     | WS <sub>max</sub>    | The maximum of wind speed.                          |
| Temperature (°C)                    | T                    | The average of temperature.                         |
|                                     | T <sub>max</sub>     | The maximum of temperature.                         |
|                                     | T <sub>min</sub>     | The minimum of temperature.                         |
|                                     | ΔT                   | The difference of temperature.                      |
| Sea level pressure (hPa)            | SLP                  | The average of sea level pressure.                  |
|                                     | SLP <sub>max</sub>   | The maximum of sea level pressure.                  |
|                                     | SLP <sub>min</sub>   | The minimum of sea level pressure.                  |
| Relative humidity (%)               | RH                   | The average of relative humidity.                   |
|                                     | RH <sub>max</sub>    | The maximum of relative humidity.                   |
| Precipitation (mm)                  | PREC                 | The accumulation of precipitation.                  |
| Wind index                          | WD/WS                | The average of wind direction value/wind speed.     |
|                                     | WD/WS <sub>sum</sub> | The sum of wind direction value/wind speed.         |
| Planetary boundary layer height (m) | PBL                  | The average of 3-h planetary boundary layer height. |
|                                     | PBL <sub>min</sub>   | The minimum of 3-h planetary boundary layer height. |
|                                     | PBL <sub>max</sub>   | The maximum of 3-h planetary boundary layer height. |

\* Since the degree data of wind direction cannot be applied directly, the values of wind directions are donated such that value = 1, 2, 3 for north, south, and “calm and variable”, respectively.

837

838 Table 4. Statistical summary showing the mean concentrations and standard deviations  
 839 of PM<sub>2.5</sub>, gaseous pollutants, and PM<sub>2.5</sub> components. BAPEC/BParade: before  
 840 APEC/Parade, AAPEC/AParade: after APEC/Parade.

| Pollutants                    | Units              | BAPEC     | APEC      | AAPEC      | BParade   | Parade    | AParade   |
|-------------------------------|--------------------|-----------|-----------|------------|-----------|-----------|-----------|
| PM <sub>2.5</sub>             |                    | 113±62    | 48±35     | 97±84      | 41±14     | 15±6      | 39±28     |
| OC                            |                    | 15.3±8.7  | 11.2±7.2  | 21.3±15.5  | 7.4±1.9   | 4.0±1.0   | 6.3±3.1   |
| EC                            |                    | 2.7±1.4   | 1.7±1.0   | 3.5±1.8    | 1.6±0.3   | 0.8±0.1   | 2.0±1.0   |
| SO <sub>4</sub> <sup>2-</sup> |                    | 12.6±9.1  | 3.9±3.0   | 9.6±12.4   | 10.6±6.2  | 2.6±1.3   | 7.9±7.3   |
| NO <sub>3</sub> <sup>-</sup>  |                    | 29.4±21.4 | 10.6±11.0 | 16.3±19.4  | 5.0±3.9   | 1.5±1.5   | 6.4±6.2   |
| NH <sub>4</sub> <sup>+</sup>  |                    | 15.0±10.6 | 4.8±4.2   | 10.3±11.9  | 5.2±2.6   | 1.5±1.0   | 5.4±5.4   |
| Cl <sup>-</sup>               |                    | 3.19±1.61 | 2.06±2.11 | 6.59±6.67  | 0.20±0.16 | 0.16±0.12 | 0.53±0.24 |
| Na <sup>+</sup>               | μg m <sup>-3</sup> | 0.50±0.26 | 0.26±0.15 | 0.57±0.46  | 0.16±0.09 | 0.10±0.05 | 0.16±0.08 |
| K <sup>+</sup>                |                    | 1.20±0.63 | 0.65±0.51 | 1.52±1.43  | 0.30±0.13 | 0.18±0.08 | 0.38±0.20 |
| Mg <sup>2+</sup>              |                    | 0.07±0.03 | 0.09±0.02 | 0.13±0.07  | 0.01±0.01 | 0.01±0.00 | 0.02±0.01 |
| Ca <sup>2+</sup>              |                    | 0.52±0.34 | 0.28±0.19 | 0.53±0.40  | 0.14±0.07 | 0.10±0.04 | 0.17±0.05 |
| SO <sub>2</sub>               |                    | 11.3±5.0  | 9.5±6.8   | 34.8±15.3  | 2.7±1.6   | 1.6±1.4   | 5.9±5.2   |
| NO                            |                    | 54.2±30.5 | 21.9±13.8 | 112.3±63.2 | 3.2±2.1   | 1.2±0.9   | 9.3±7.5   |
| NO <sub>x</sub>               |                    | 151±62    | 81±46     | 220±107    | 57±11     | 26±13     | 63±24     |
| O <sub>3</sub>                |                    | 23±16     | 38±19     | 17±14      | 116±33    | 79±22     | 74±27     |
| Ca                            |                    | 582±431   | 591±335   | 1536±579   | 202±64    | 108±36    | 188±130   |
| Co                            |                    | 0.48±0.21 | 0.34±0.18 | 0.90±0.52  | 0.21±0.08 | 0.05±0.02 | 0.16±0.10 |
| Ni                            |                    | 3.20±1.56 | 5.07±7.42 | 5.17±2.50  | 1.75±1.16 | 0.63±0.72 | 1.16±0.67 |
| Cu                            |                    | 35.7±16.2 | 19.1±12.6 | 43.3±31.2  | 12.4±5.1  | 3.7±1.3   | 9.6±6.5   |
| Zn                            |                    | 320±146   | 128±120   | 315±310    | 97±46     | 20±9      | 71±54     |
| Se                            |                    | 6.45±3.46 | 3.76±3.84 | 5.22±6.56  | 7.06±3.41 | 3.19±2.76 | 3.17±2.76 |
| Mo                            |                    | 2.20±1.12 | 1.63±1.14 | 2.85±2.67  | 0.62±0.41 | 0.16±0.14 | 0.53±0.46 |
| Cd                            |                    | 3.86±2.53 | 1.41±1.25 | 3.11±2.52  | 2.35±5.72 | 0.22±0.17 | 0.71±0.74 |
| Tl                            |                    | 1.87±0.90 | 0.87±1.01 | 2.03±1.96  | 0.50±0.31 | 0.05±0.06 | 0.33±0.39 |
| Pb                            | ng m <sup>-3</sup> | 121±59    | 55±52     | 104±81     | 36±19     | 9±6       | 29±26     |
| Th                            |                    | 0.09±0.05 | 0.06±0.03 | 0.09±0.06  | 0.02±0.01 | 0.01±0.01 | 0.01±0.01 |
| U                             |                    | 0.06±0.02 | 0.05±0.03 | 0.09±0.06  | 0.02±0.01 | 0.00±0.00 | 0.01±0.02 |
| Na                            |                    | 529±261   | 355±209   | 907±632    | 182±71    | 96±39     | 181±96    |
| Mg                            |                    | 153±94    | 105±47    | 236±143    | 43±13     | 15±8      | 24±15     |
| Al                            |                    | 516±324   | 338±154   | 588±406    | 141±82    | 130±60    | 136±93    |
| Mn                            |                    | 55.5±23.3 | 34.5±24.1 | 61.6±52.4  | 17.3±6.4  | 3.6±1.8   | 14.8±9.2  |
| Fe                            |                    | 755±314   | 573±336   | 883±538    | 269±71    | 98±28     | 234±139   |
| Ba                            |                    | 16.3±8.0  | 11.0±8.4  | 13.8±8.1   | 4.7±1.6   | 1.9±0.6   | 4.1±2.3   |

841

842

843

844

845

**Table 5.** The cross-validation (CV) performance of the PM<sub>2.5</sub> GLM.

| Periods | Adjusted<br>R <sup>2</sup> | Observed<br>mean<br>values (µg<br>m <sup>-3</sup> ) | Predicted<br>mean<br>values (µg<br>m <sup>-3</sup> ) | Daily<br>RMSE<br>(µg m <sup>-3</sup> ) | Total<br>RMSE<br>(µg m <sup>-3</sup> ) | Relative<br>errors<br>(RE)* | Mean<br>RE | RMSE of RE |
|---------|----------------------------|-----------------------------------------------------|------------------------------------------------------|----------------------------------------|----------------------------------------|-----------------------------|------------|------------|
| CV1     | 0.748                      | 94                                                  | 82                                                   | 53                                     |                                        | 15%                         |            |            |
| CV2     | 0.798                      | 59                                                  | 57                                                   | 20                                     |                                        | 4%                          |            |            |
| CV3     | 0.783                      | 44                                                  | 52                                                   | 19                                     | 33                                     | -15%                        | -5%        | 14.6%      |
| CV4     | 0.710                      | 54                                                  | 65                                                   | 27                                     |                                        | -17%                        |            |            |
| CV5     | 0.807                      | 41                                                  | 47                                                   | 30                                     |                                        | -13%                        |            |            |

\*Relative error (RE) = (Predicted mean value - Observed mean value)/Predicted mean value × 100%.

848 **Table 6.** The concentrations of air pollutants for the GLM with adjusted R<sup>2</sup> values higher  
 849 than 0.6.

| Pollutants                    | Model descriptions                                                                                                                                                                                                                                                                                                                                   | Adjusted R <sup>2</sup> |
|-------------------------------|------------------------------------------------------------------------------------------------------------------------------------------------------------------------------------------------------------------------------------------------------------------------------------------------------------------------------------------------------|-------------------------|
| PM <sub>2.5</sub>             | $\ln(\text{PM}_{2.5}) = -0.48\ln\text{WS} - 0.43\ln\text{WS}_{\max(\text{lag})} - 0.00076\text{PBL}_{\max} - 0.11\text{PREC} + 0.25\ln\Delta\text{T}_{(\text{lag})} - 0.14\text{WS}_{\text{mode}} + 0.48\text{WD}/\text{WS}_{(\text{lag})} + 0.0043\text{PBL}_{\min(\text{lag})} - 0.025\text{PREC}_{(\text{lag})} - 0.015\text{SLP}_{\min} + 19.51$ | 0.808                   |
| EC                            | $\ln(\text{EC}) = 0.60\ln\text{WD}/\text{WS}_{\text{sum}} - 0.59\ln\text{PBL} - 0.017\text{PREC}_{(\text{lag})} + 0.22\ln\Delta\text{T} - 0.50\ln\text{WS}_{(\text{lag})} + 0.25\ln\text{PBL}_{\max(\text{lag})} - 0.17$                                                                                                                             | 0.780                   |
| OC                            | $\ln(\text{OC}) = -0.44\ln\text{WS} + 0.47\text{WD}/\text{WS}_{(\text{lag})} - 0.67\ln\text{PBL} - 0.020\text{PREC}_{(\text{lag})} + 0.67\ln\text{WD} + 0.17\ln\Delta\text{T} - 0.65\ln\text{RH}_{\max(\text{lag})} + 7.84$                                                                                                                          | 0.751                   |
| SO <sub>4</sub> <sup>2-</sup> | $\ln(\text{SO}_4^{2-}) = -0.99\ln\text{WS}_{(\text{lag})} + 0.066\text{T}_{\min} - 0.040\text{PREC}_{(\text{lag})} - 1.20\ln\text{PBL} + 0.0011\text{PBL}_{(\text{lag})} + 0.019\text{RH} - 0.12\text{PREC} + 0.087\text{WS}_{\max} + 6.68$                                                                                                          | 0.795                   |
| NO <sub>3</sub> <sup>-</sup>  | $\ln(\text{NO}_3^-) = -1.90\ln\text{PBL} - 0.96\ln\text{WS}_{(\text{lag})} + 0.88\text{WD} + 0.0045\text{PBL}_{\min} - 0.20\text{PREC} + 0.12\text{WS}_{\max} + 1.57\ln\text{RH} + 0.60\ln\Delta\text{T}_{(\text{lag})} - 1.22\ln\text{RH}_{\max(\text{lag})} - 0.047\Delta\text{T} + 9.32$                                                          | 0.833                   |
| NH <sub>4</sub> <sup>+</sup>  | $\ln(\text{NH}_4^+) = 0.040\text{RH} - 1.27\ln\text{WS}_{(\text{lag})} - 1.03\ln\text{RH}_{(\text{lag})} - 0.00075\text{PBL}_{\max} - 0.16\text{PREC} + 0.33\ln\Delta\text{T}_{(\text{lag})} + 4.28$                                                                                                                                                 | 0.813                   |
| Cl <sup>-</sup>               | $\ln(\text{Cl}^-) = -1.12\ln\text{PBL} - 0.072\text{T}_{(\text{lag})} + 1.60\ln\text{WD} - 2.32\ln\text{RH}_{\max(\text{lag})} + 0.53\ln\text{WD}/\text{WS}_{\text{sum}(\text{lag})} + 14.69$                                                                                                                                                        | 0.737                   |
| K <sup>+</sup>                | $\ln(\text{K}^+) = -0.75\ln\text{PBL} - 0.66\ln\text{WS}_{(\text{lag})} - 0.020\text{RH}_{(\text{lag})} + 0.0056\text{PBL}_{\min} - 0.20\text{WS}_{\text{mode}} + 0.33\ln\Delta\text{T}_{(\text{lag})} - 0.47\ln\text{PBL}_{\max(\text{lag})} - 0.087\text{PREC} + 0.66\ln\text{RH} + 5.46$                                                          | 0.717                   |
| Pb                            | $\ln(\text{Pb}) = -0.61\ln\text{WS} - 0.67\ln\text{WS}_{\max(\text{lag})} + 0.36\ln\Delta\text{T}_{(\text{lag})} - 0.00062\text{PBL}_{\max} - 0.19\text{WS}_{\text{mode}} - 0.030\text{PREC}_{(\text{lag})} + 5.39$                                                                                                                                  | 0.721                   |
| Zn                            | $\ln(\text{Zn}) = -0.81\ln\text{WS} - 0.41\ln\text{WS}_{\max(\text{lag})} - 0.0016\text{PBL} - 0.36\ln\text{WS}_{\text{mode}(\text{lag})} + 6.56$                                                                                                                                                                                                    | 0.627                   |
| Mn                            | $\ln(\text{Mn}) = 0.80\text{WD}/\text{WS} - 0.98\ln\text{PBL} - 0.043\text{PREC}_{(\text{lag})} + 0.57\text{WD}/\text{WS}_{(\text{lag})} - 0.017\text{RH} - 0.023\text{SLP} + 0.0030\text{PBL}_{\min(\text{lag})} + 31.04$                                                                                                                           | 0.656                   |
| SO <sub>2</sub>               | $\ln(\text{SO}_2) = -1.32\ln\text{PBL} - 0.071\text{PREC}_{(\text{lag})} - 0.047\text{PREC} + 0.29\text{WD}_{\text{mode}(\text{lag})} - 0.026\text{RH} - 0.47\ln\text{WS}_{(\text{lag})} + 14.12\ln\text{SLP}_{\max} - 87.56$                                                                                                                        | 0.803                   |
| NO <sub>x</sub>               | $\ln(\text{NO}_x) = 0.014\text{WD}/\text{WS}_{\text{sum}} - 0.030\text{T}_{\min} + 0.27\ln\Delta\text{T} - 0.44\ln\text{PBL} - 0.015\text{PREC} - 0.012\text{PREC}_{(\text{lag})} + 5.30$                                                                                                                                                            | 0.772                   |

850  
851

852 **Table 7.** The output indexes of the PM<sub>2.5</sub> GLM, including a model summary, analysis  
 853 of variance (ANOVA), coefficients, and other indexes.

| Model Summary and ANOVA  |                             |                         |                            |               |                         |       |
|--------------------------|-----------------------------|-------------------------|----------------------------|---------------|-------------------------|-------|
| R                        | R <sup>2</sup>              | Adjusted R <sup>2</sup> | Std. Error of the Estimate | Durbin-Watson | F                       | Sig.* |
| 0.910                    | 0.828                       | 0.808                   | 0.411                      | 1.910         | 41.763                  | 0.000 |
| Coefficients             |                             |                         |                            |               |                         |       |
| Model                    | Unstandardized Coefficients |                         | t                          | Sig.*         | Collinearity Statistics |       |
|                          | B                           | Std. Error              |                            |               | Tolerance               | VIF   |
| (Constant)               | 19.512                      | 6.871                   | 2.840                      | 0.006         |                         |       |
| lnWS                     | -0.483                      | 0.162                   | -2.971                     | 0.004         | 0.313                   | 3.194 |
| lnWS <sub>max(lag)</sub> | -0.431                      | 0.153                   | -2.818                     | 0.006         | 0.300                   | 3.331 |
| PBL <sub>max</sub>       | -0.001                      | 0.000                   | -6.747                     | 0.000         | 0.395                   | 2.534 |
| PREC                     | -0.110                      | 0.029                   | -3.735                     | 0.000         | 0.618                   | 1.618 |
| lnΔT <sub>(lag)</sub>    | 0.247                       | 0.083                   | 2.975                      | 0.004         | 0.662                   | 1.512 |
| WS <sub>mode</sub>       | -0.135                      | 0.050                   | -2.726                     | 0.008         | 0.493                   | 2.027 |
| WD/WS <sub>(lag)</sub>   | 0.476                       | 0.148                   | 3.222                      | 0.002         | 0.353                   | 2.829 |
| PBL <sub>min(lag)</sub>  | 0.004                       | 0.001                   | 3.510                      | 0.001         | 0.407                   | 2.459 |
| PREC <sub>(lag)</sub>    | -0.025                      | 0.009                   | -2.796                     | 0.006         | 0.707                   | 1.415 |
| SLP <sub>min</sub>       | -0.015                      | 0.007                   | -2.176                     | 0.032         | 0.707                   | 1.414 |

\*The significance level is 0.05.

854  
 855  
 856  
 857



858 Table 8. The influence of the meteorological parameters included in the GLMs on  
 859 pollutant concentrations<sup>1</sup>.

| Parameters             | Included<br>in the<br>GLM<br>(times) <sup>2</sup> | PM <sub>2.5</sub> | EC | OC | SO <sub>4</sub> <sup>2-</sup> | NO <sub>3</sub> <sup>-</sup> | NH <sub>4</sub> <sup>+</sup> | Cl <sup>-</sup> | K <sup>+</sup> | Pb | Zn | Mn | SO <sub>2</sub> | NO <sub>x</sub> |
|------------------------|---------------------------------------------------|-------------------|----|----|-------------------------------|------------------------------|------------------------------|-----------------|----------------|----|----|----|-----------------|-----------------|
|                        |                                                   |                   |    |    |                               |                              |                              |                 |                |    |    |    |                 |                 |
| PBL                    | 13                                                | -                 | -  | -  | -                             | +-                           | -                            | -               | +-             | -  | -  | -  | -               | -               |
| WS <sub>(lag)</sub>    | 9                                                 | -                 | -  |    | -                             | -                            | -                            |                 | -              | -  | -  |    | -               |                 |
| PREC <sub>(lag)</sub>  | 8                                                 | -                 | -  | -  | -                             |                              |                              |                 |                | -  |    | -  | -               | -               |
| PREC                   | 7                                                 | -                 |    |    | -                             | -                            | -                            |                 | -              |    |    |    | -               | -               |
| WS                     | 7                                                 | -                 |    | -  | +                             | +                            |                              |                 | -              | -  | -  |    |                 |                 |
| RH                     | 6                                                 |                   |    |    | +                             | +                            | +                            |                 | +              |    |    | -  | -               |                 |
| PBL <sub>(lag)</sub>   | 5                                                 | +                 | +  |    | +                             |                              |                              |                 | -              |    |    | +  |                 |                 |
| RH <sub>(lag)</sub>    | 5                                                 |                   |    | -  |                               | -                            | -                            | -               | -              |    |    |    |                 |                 |
| T                      | 5                                                 |                   | +  | +  | +                             | +-                           |                              |                 |                |    |    |    |                 | +               |
| T <sub>(lag)</sub>     | 5                                                 | +                 |    |    |                               |                              | +                            | -               | +              | +  |    |    |                 |                 |
| WD/WS <sub>(lag)</sub> | 4                                                 | +                 |    | +  |                               |                              |                              | +               |                |    |    | +  |                 |                 |
| SLP                    | 3                                                 | -                 |    |    |                               |                              |                              |                 |                |    |    | -  | +               |                 |
| WD                     | 3                                                 |                   |    | +  |                               | +                            |                              | +               |                |    |    |    |                 |                 |
| WD/WS                  | 3                                                 |                   | +  |    |                               |                              |                              |                 |                |    |    | +  |                 | +               |
| WD <sub>(lag)</sub>    | 1                                                 |                   |    |    |                               |                              |                              |                 |                |    |    |    | +               |                 |

860 <sup>1</sup> “+” represents the positive correlation, and “-” represents the negative correlation between  
 861 meteorological parameters and pollutant concentrations.

862 <sup>2</sup>If a parameter is included in the model for several times, it will be counted as one time.

863

864

865 **Table 9.** The percentage differences between the observed and GLM-predicted  
 866 concentrations of the air pollutants during APEC and Parade.

| Pollutants                    | Units                | During APEC |           |                                     | During Parade |           |                                     |
|-------------------------------|----------------------|-------------|-----------|-------------------------------------|---------------|-----------|-------------------------------------|
|                               |                      | Observed    | Predicted | Percentage differences <sup>1</sup> | Observed      | Predicted | Percentage differences <sup>1</sup> |
| PM <sub>2.5</sub>             |                      | 48          | 67        | 28%                                 | 15            | 20        | 25%                                 |
| OC                            |                      | 11.2        | 12.6      | 11%                                 | 4.0           | 3.7       | -8%                                 |
| EC                            |                      | 1.7         | 2.7       | 37%                                 | 0.8           | 1.2       | 33%                                 |
| SO <sub>4</sub> <sup>2-</sup> | μg m <sup>-3</sup>   | 3.9         | 2.7       | -44%                                | 2.6           | 5.2       | 50%                                 |
| NO <sub>3</sub> <sup>-</sup>  |                      | 10.6        | 19.0      | 44%                                 | 1.5           | 3.4       | 56%                                 |
| NH <sub>4</sub> <sup>+</sup>  |                      | 4.8         | 5.5       | 13%                                 | 1.5           | 2.4       | 38%                                 |
| Cl <sup>-</sup>               |                      | 2.06        | 2.58      | 20%                                 | 0.16          | 0.17      | 6%                                  |
| K <sup>+</sup>                |                      | 0.65        | 1.03      | 37%                                 | 0.18          | 0.24      | 25%                                 |
| Pb                            |                      | 55          | 70        | 21%                                 | 9             | 17        | 47%                                 |
| Zn                            | ng m <sup>-3</sup>   | 128         | 171       | 25%                                 | 20            | 41        | 51%                                 |
| Mn                            |                      | 34.5        | 51.5      | 33%                                 | 3.6           | 7.6       | 53%                                 |
| SO <sub>2</sub>               | ppb                  | 3.32        | 6.59      | 50%                                 | 0.57          | 0.56      | -2%                                 |
| NO <sub>x</sub>               |                      | 45          | 102       | 56%                                 | 13            | 20        | 35%                                 |
| OC+EC                         | μg m <sup>-3</sup>   | 12.9        | 15.3      | 16%                                 | 4.8           | 4.9       | 2%                                  |
| SNA                           | μg m <sup>-3</sup>   | 19.3        | 27.2      | 29%                                 | 5.6           | 11.0      | 49%                                 |
| total S <sup>2</sup>          | μmol m <sup>-3</sup> | 0.189       | 0.322     | 41%                                 | 0.053         | 0.079     | 33%                                 |

<sup>1</sup>Percentage difference = (Predicted - Observed)/Predicted × 100%.

<sup>2</sup>total S = [SO<sub>2</sub>] + [SO<sub>4</sub><sup>2-</sup>].

867

868

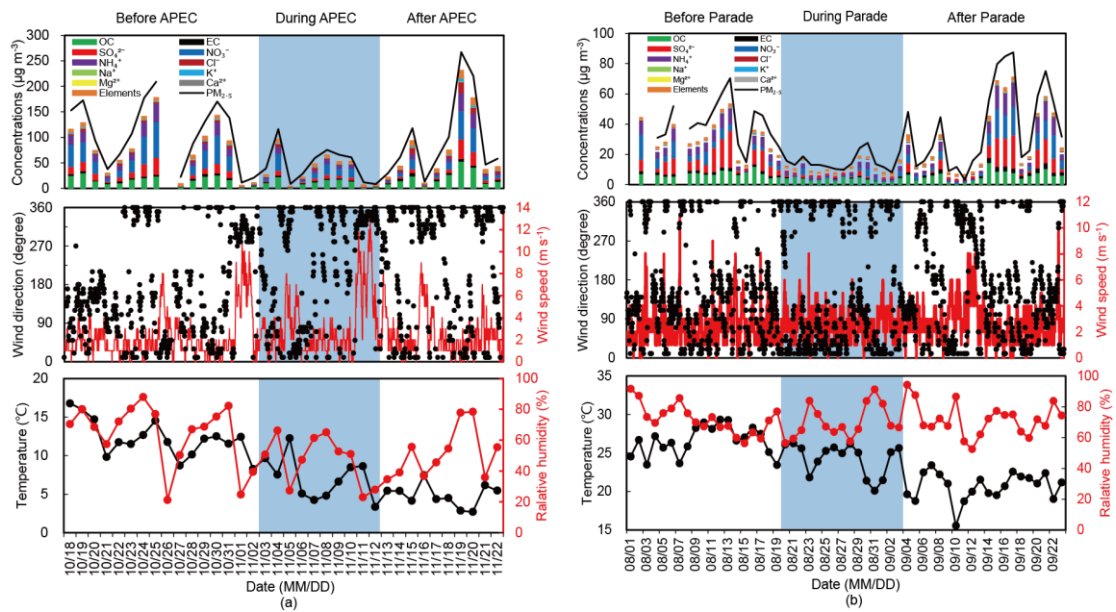

870

871 Figure 1. Time series of atmospheric particulate matter of aerodynamic diameter  $\leq 2.5$   
 872  $\mu m$  ( $PM_{2.5}$ ) and the concentrations of its components, wind direction (WD), wind speed  
 873 (WS), temperature (T), and relative humidity (RH) before, during, and after (a) APEC  
 874 2014 and (b) Parade 2015. The blue-shaded areas highlight the pollution control periods  
 875 of APEC 2014 (3 November to 12 November 2014) and Parade 2015 (20 August to 3  
 876 September 2015).

877

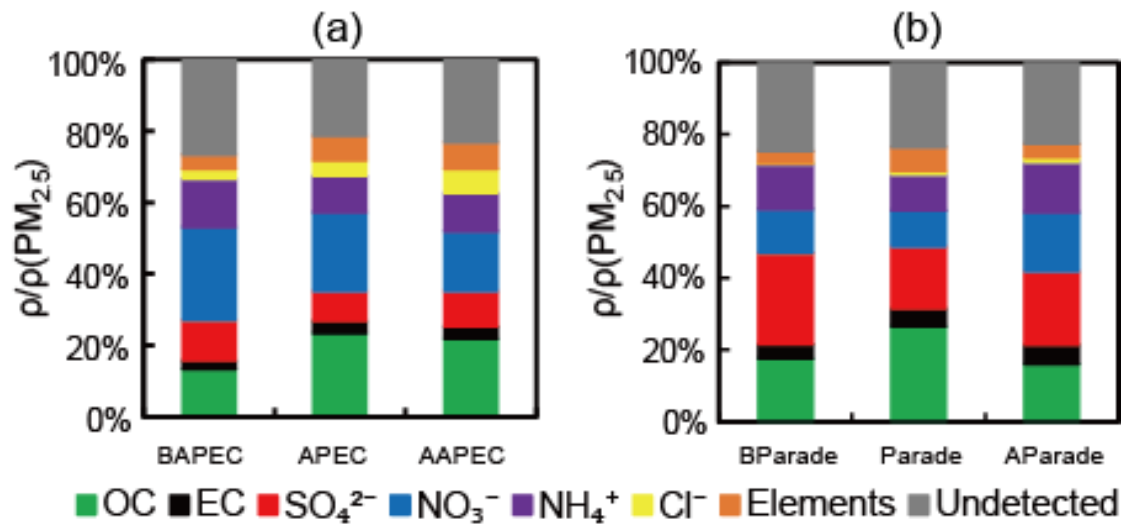

878

879 Figure 2. Proportions of the measured components in PM<sub>2.5</sub> during (a) APEC 2014 and

880 (b) Parade 2015 campaigns, including organic carbon (OC), elemental carbon (EC),

881  $\text{SO}_4^{2-}$ ,  $\text{NO}_3^-$ ,  $\text{NH}_4^+$ ,  $\text{Cl}^-$  and elements. BAPEC/BParade: before APEC/Parade,

882 AAPEC/AParade: after APEC/Parade.

883

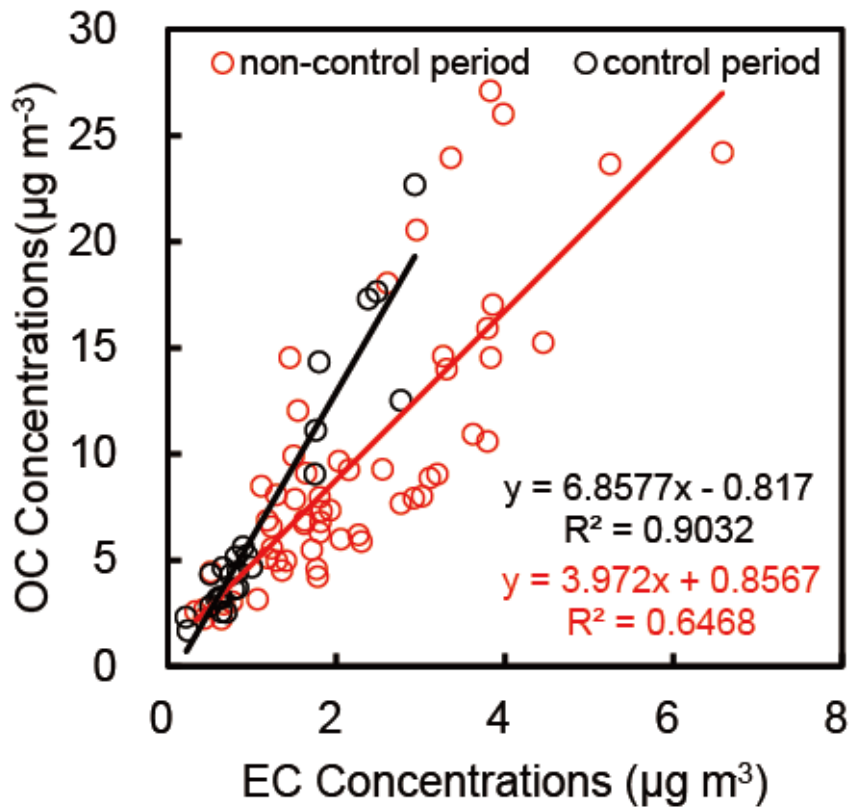

884

885 Figure 3. Scatter plot and correlations between organic carbon (OC:  $y$ -axis) and  
 886 elemental carbon (EC:  $x$ -axis) concentrations of  $\text{PM}_{2.5}$  during the APEC 2014 and  
 887 Parade 2015 campaigns. The red symbols denote the non-control period and the black  
 888 symbols denote the pollution control period. The linear regression equations and  $R^2$   
 889 values are given for these two campaigns.

890

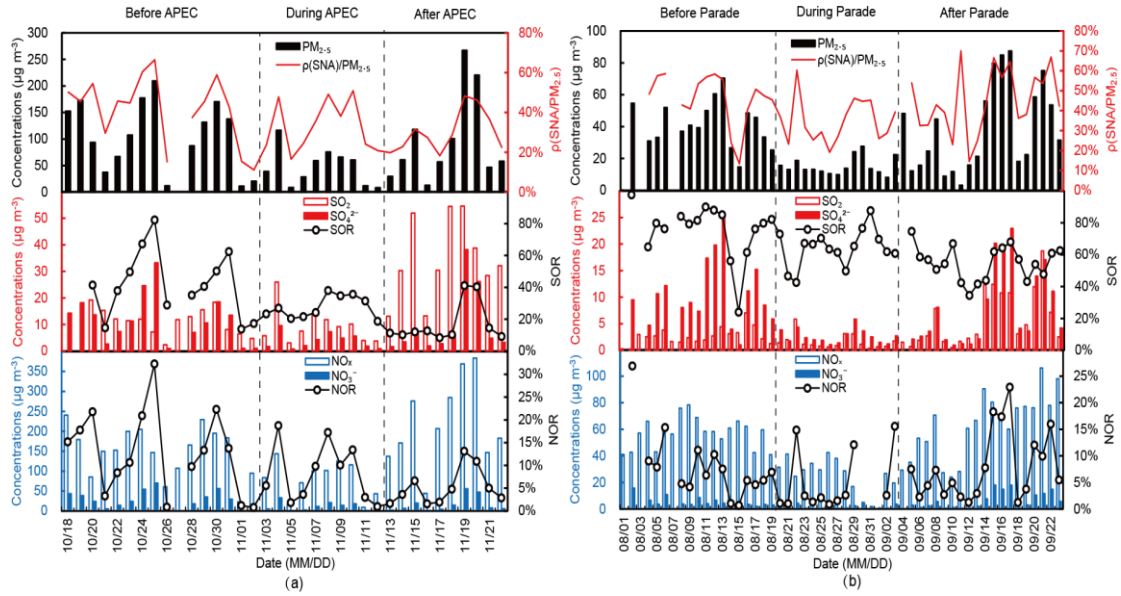

891

892 Figure 4. Upper panel: time series of the proportion of sulphate, nitrate, and ammonia

893 (SNA) in  $PM_{2.5}$  ( $\rho(SNA/PM_{2.5})$ ) and  $PM_{2.5}$  mass concentrations (the black bar

894 represents  $PM_{2.5}$  concentration and the red line represents  $\rho(SNA/PM_{2.5})$ ). Middle panel:

895  $SO_2$ ,  $SO_4^{2-}$ , and SOR ( $[SO_4^{2-}]/([SO_2]+[SO_4^{2-}])$ ). Lower panel:  $NO_x$ ,  $NO_3^-$ , and NOR

896 ( $[NO_3^-]/([NO_x]+[NO_3^-])$ ). Data collected during the (a) APEC 2014 and (b) Parade

897 2015 campaigns. The hollow bars represent gaseous pollutants (red for  $SO_2$ , blue for

898  $NO_x$ ), and solid bars represent secondary inorganic ions (red for sulphate, blue for

899 nitrate).

900

901

902

903

904

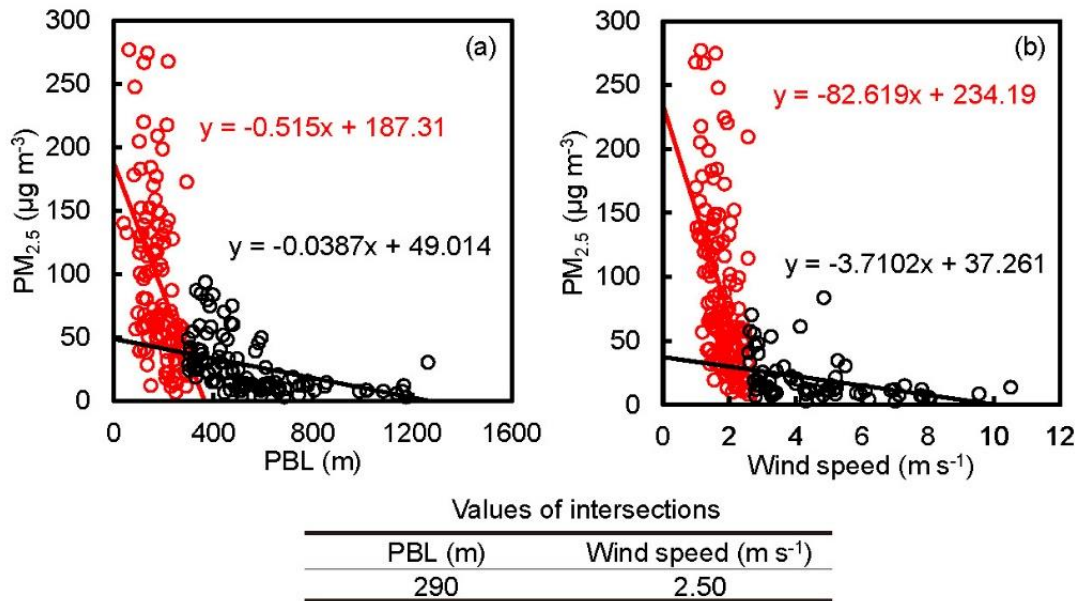

905

906 **Figure 5.** Scatter plot showing the correlation between daily PM<sub>2.5</sub> concentrations (y-  
 907 axis) and (a) daily PBL heights (x-axis) and (b) daily WSs (x-axis) during **the sampling**

908 **periods.** The red and black scattered points represent different distribution areas. The

909 piecewise function regression equations and the corresponding values of PBL height

910 and WS according to the intersections are given.

911

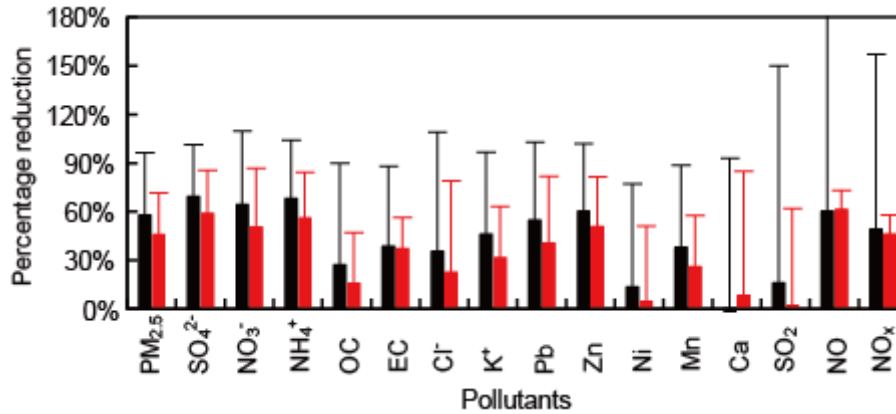

912

913 Figure 6. The percentage reductions of pollutant concentrations under similar

914 meteorological conditions. The black bars represent the percentage reductions

915 calculated by comparing the decreased average concentrations during APEC to the

916 average concentrations before APEC. The red bars represent the percentage reductions

917 calculated by comparing the decreased average concentrations during APEC to the

918 average concentrations before APEC based only on the days with stable meteorological

919 conditions. The whiskers represent the standard deviations of the percentage reductions.

920

921



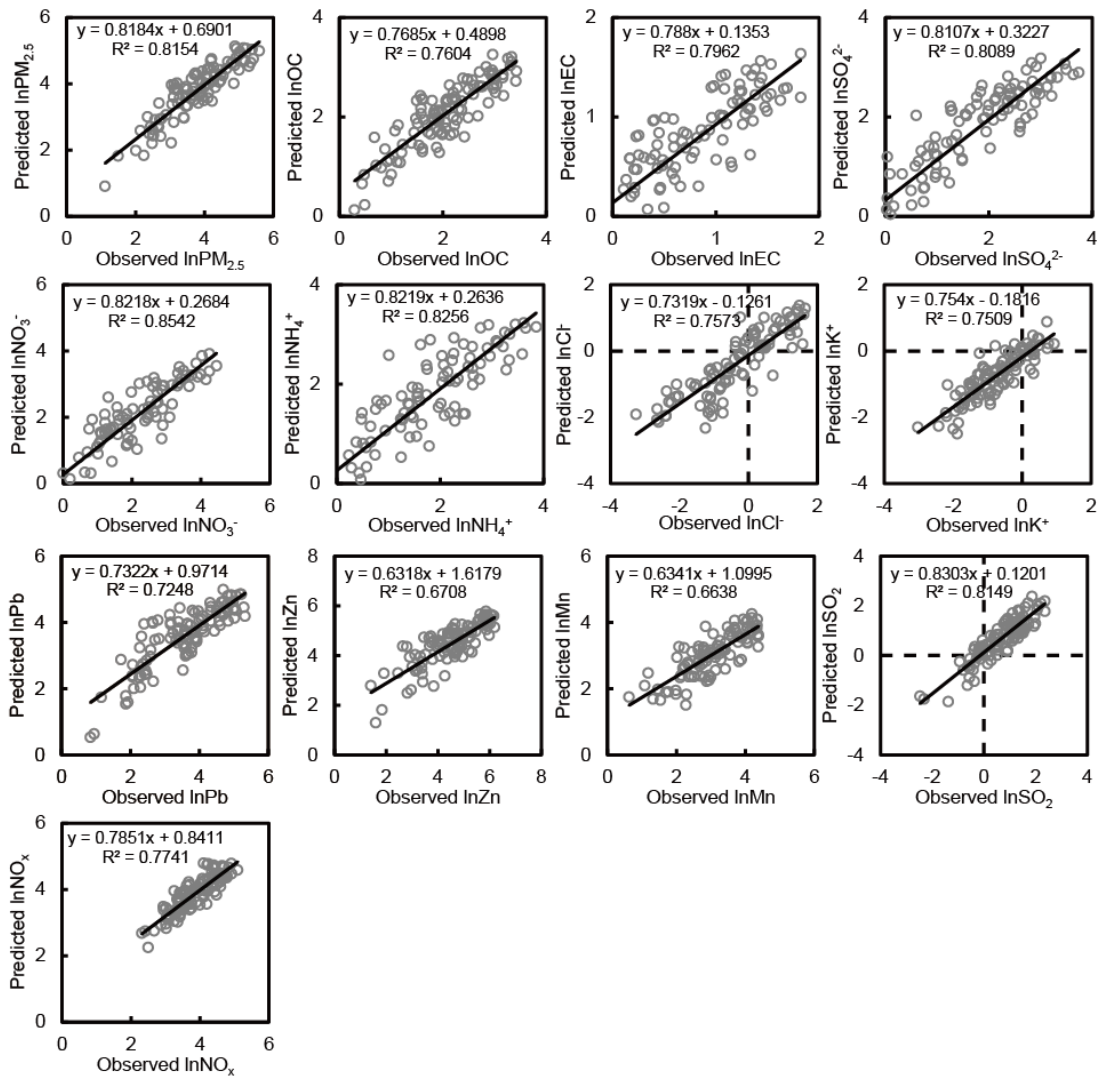

922

923 Figure 7. Scatter plot and correlations between GLM-predicted (y-axis) and observed  
 924 (x-axis) concentrations of pollutants transformed to a natural log. The linear regression  
 925 equations and  $R^2$  values are given.

926

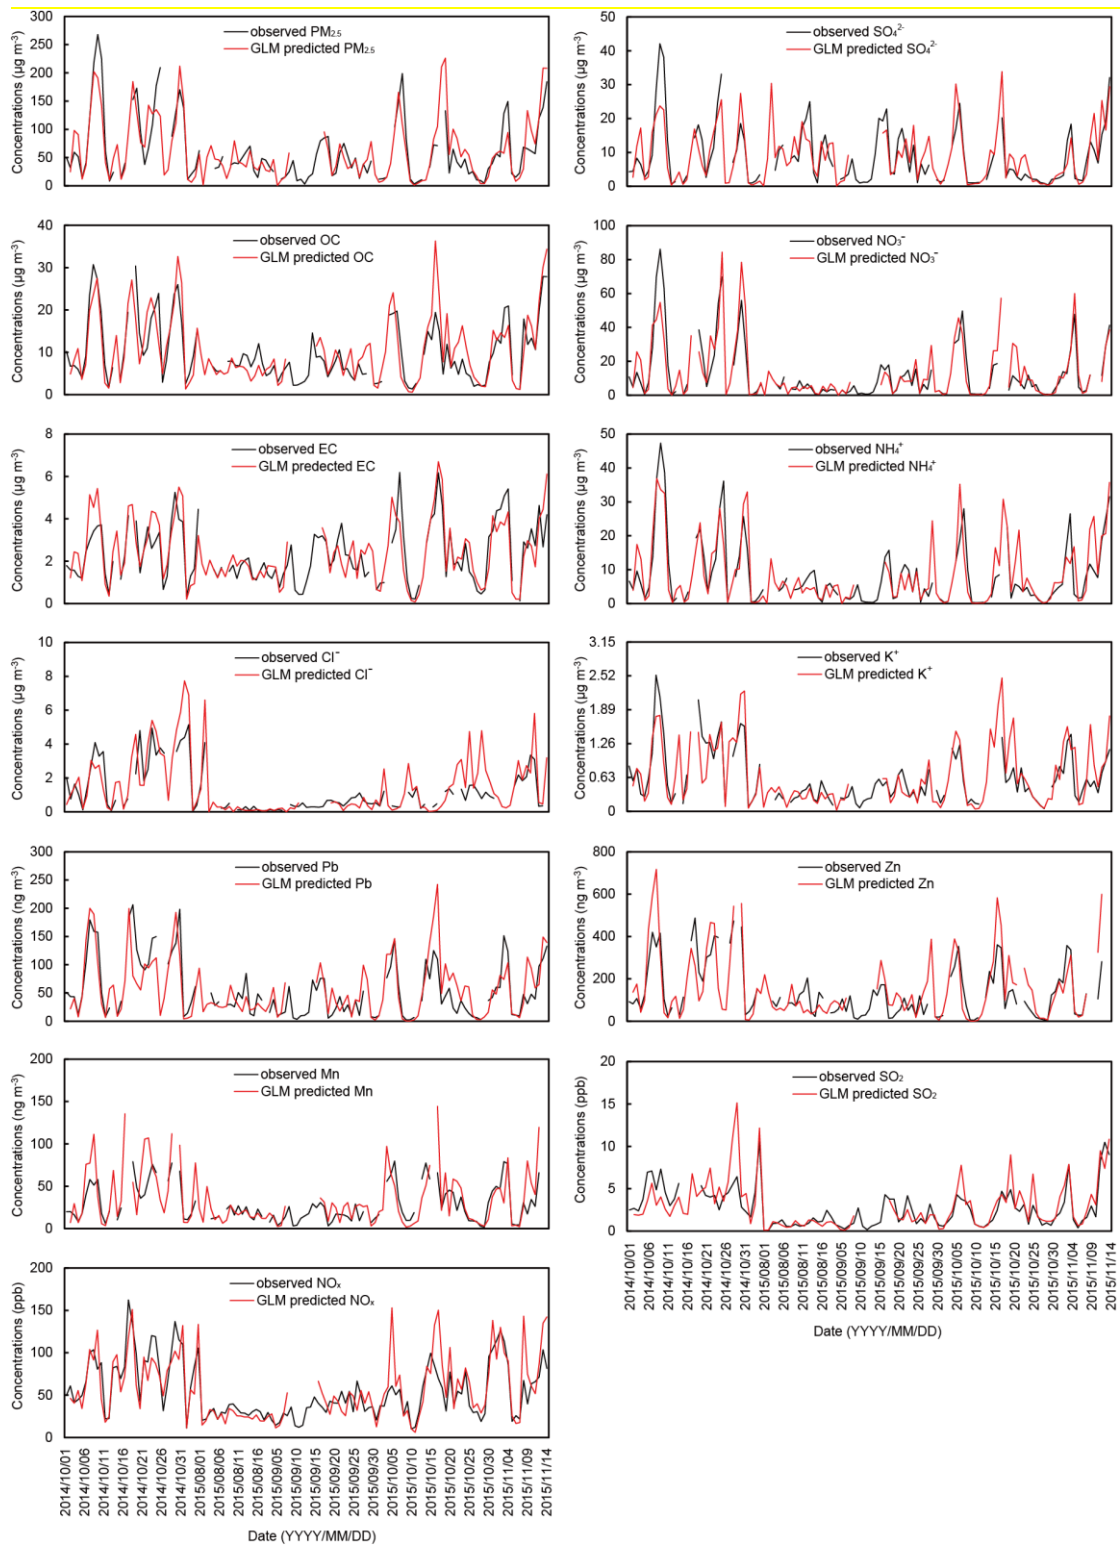

927  
 928  
 929  
 930

Figure 8. Time series of the observed (in black line) and GLM-predicted pollutant concentrations (in red line).

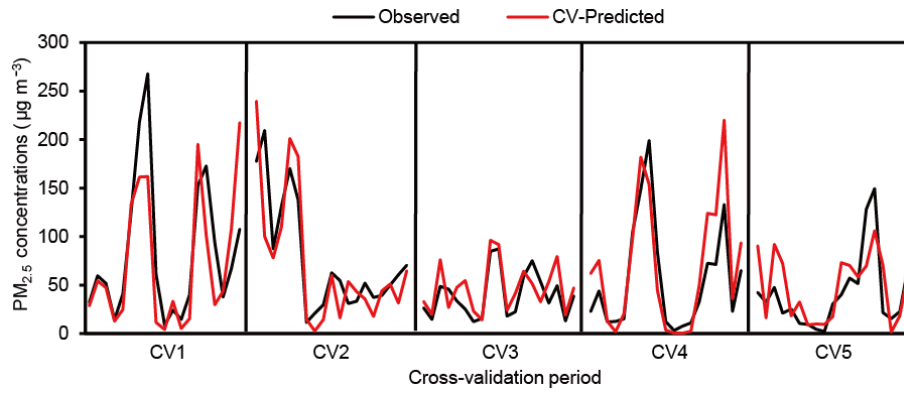

931

932 **Figure 9.** Time series of the observed and cross-validation (CV) predicted PM<sub>2.5</sub>  
 933 concentrations during five CV periods. The black line represents the observed PM<sub>2.5</sub>  
 934 concentration and the red line represents the CV-predicted PM<sub>2.5</sub> concentration.

935

936
